1 **PI(4,5)P<sub>2</sub> forms dynamic cortical structures and directs actin**  
2 **distribution and cell polarity in *C. elegans* embryos**

3  
4 Melina J. Scholze<sup>(1)</sup>, Kévin S. Barbieux<sup>(2)</sup>, Alessandro De Simone<sup>(1,3)</sup>, Mathilde  
5 Boumasmoud<sup>(1,4)</sup>, Camille C. N. Süess<sup>(1)</sup>, Ruijia Wang<sup>(1)</sup>, and Pierre Gönczy<sup>(1)</sup>

6 (1) Swiss Institute for Experimental Cancer Research (ISREC), School of Life Sciences, Swiss  
7 Federal Institute of Technology (EPFL), Lausanne, Switzerland

8 (2) Geodetic Engineering Laboratory (TOPO), Swiss Federal Institute of Technology (EPFL),  
9 Environmental Engineering Institute (IIE), Lausanne Switzerland

10

11 Present addresses:

12 (3) Department of Cell Biology, Duke University Medical Center, Durham 27710 USA

13 (4) Division of Infectious Diseases and Hospital Epidemiology, University Hospital Zürich,  
14 University of Zürich, Zürich, Switzerland

15

16 Corresponding author: Pierre Gönczy ([pierre.gonczy@epfl.ch](mailto:pierre.gonczy@epfl.ch))

17 3-6 key words: *C. elegans* embryo, Phosphoinositides, PIP<sub>2</sub>, asymmetric cell  
18 division, actin, PAR polarity.

19 Summary statement: PI(4,5)P<sub>2</sub> is distributed in dynamic cortical structures and  
20 regulates asymmetric division by controlling actin organization and cell polarity in the  
21 one-cell *C. elegans* embryo.

22 Author Contributions: M.S. and P.G. designed the project; M.S. conducted  
23 experiments with support from M.B., C.N., and R.W; M.S. and P.G. analyzed the  
24 data; M.S. and K.B. performed PIV analysis, M.S., K.B. and A.D. developed image  
25 processing and analysis scripts; M.S. and P.G. wrote the manuscript.

26 **Abstract**

27 Asymmetric division is crucial for embryonic development and stem cell lineages. In  
28 the one-cell *C. elegans* embryo, a contractile cortical actomyosin network contributes  
29 to anterior-posterior (A-P) polarity and asymmetric division by segregating PAR  
30 proteins to discrete cortical domains. Here, we discovered that the plasma  
31 membrane lipid phosphatidylinositol 4,5-bisphosphate (PIP<sub>2</sub>) forms dynamic  
32 structures in *C. elegans* zygotes, distributing in a polarized and PAR-dependent  
33 manner along the A-P axis. PIP<sub>2</sub> cortical structures overlap with F-actin and coincide  
34 with the actin regulators RHO-1, CDC-42 and ECT-2. Particle image velocimetry  
35 analysis revealed that PIP<sub>2</sub> and F-actin cortical movements are coupled, with PIP<sub>2</sub>  
36 structures moving slightly ahead. Importantly, we established that PIP<sub>2</sub> cortical  
37 structures form in an actin-dependent manner and, conversely, that decreasing or  
38 increasing the level of PIP<sub>2</sub> results in severe F-actin disorganization, revealing the  
39 interdependence between these components. Furthermore, we uncovered that PIP<sub>2</sub>  
40 regulates the sizing of PAR cortical domains. Overall, our work establishes for the  
41 first time that a lipid membrane component, PIP<sub>2</sub>, is a critical modulator of actin  
42 organization and cell polarity in *C. elegans* embryos.

## 43 **Introduction**

44 Asymmetric division generates cellular diversity and is particularly prevalent during  
45 development. During intrinsic asymmetric division, polarity is established and  
46 maintained in a mother cell; thereafter, polarity is translated into correct spindle  
47 positioning during mitosis along this polarity axis, resulting in the proper cleavage  
48 and partition of cellular contents to daughter cells. The extensively studied and  
49 evolutionarily conserved partitioning defective (PAR) proteins are critical for cell  
50 polarity and asymmetric division (reviewed in Goldstein and Macara, 2007; Gönczy,  
51 2008; Knoblich, 2010). By contrast to the wealth of knowledge regarding PAR  
52 proteins and interacting components, the involvement of lipid plasma membrane  
53 components in cell polarity is less understood, in particular in developing systems.

54 The early *C. elegans* embryo has proven instrumental for dissecting the  
55 mechanisms governing asymmetric division (reviewed in Hoege and Hyman, 2013;  
56 Pacquelet, 2017; Rose and Gönczy, 2014). Shortly after fertilization, the entire  
57 embryo surface exhibits uniform contractions of the cortical actomyosin network  
58 located underneath the plasma membrane (Munro et al., 2004). These contractions  
59 are driven by non-muscle myosin 2 (NMY-2), which is activated by the Rho GTPase  
60 RHO-1 and its guanine nucleotide exchange factor (GEF) ECT-2 (Motegi and  
61 Sugimoto, 2006; Schonegg and Hyman, 2006). Sperm-derived centrioles are key for  
62 breaking symmetry of this system and for inducing local disappearance of cortical  
63 ECT-2 in their vicinity, thereby determining the embryo posterior. This leads to local  
64 inactivation of RHO-1 and initiation of cortical flows away from this region, towards  
65 the future embryo anterior (Bienkowska and Cowan, 2012; Cowan and Hyman, 2004;  
66 Motegi and Sugimoto, 2006). Polarized contractility promotes establishment of PAR  
67 polarity, whereby PAR-3, PAR-6, and atypical protein kinase C-like 3 (PCK-3) are  
68 segregated to the anterior side, whereas PAR-1, PAR-2, and Larval Giant Larvae-like  
69 1(LGL-1) occupy the expanding posterior cortical domain (reviewed in Hoege and  
70 Hyman, 2013; Pacquelet, 2017; Rose and Gönczy, 2014). The RhoGTPase CDC-42  
71 is also segregated to the anterior, where it stabilizes the actomyosin network and  
72 promotes PAR-6 association with the cortex (Kumfer et al., 2010; Motegi and  
73 Sugimoto, 2006; Schonegg and Hyman, 2006).

74 PAR polarity can be established in *C. elegans* zygotes also though a partially  
75 redundant pathway, whereby microtubules nucleated from centrosomes protect PAR-

76 2 from PKC-3-mediated phosphorylation, thus allowing PAR-2 association with  
77 phospholipids at the embryo posterior (Motegi et al., 2011). In other systems,  
78 homologues of PAR proteins and interacting components also associate with  
79 phospholipids, as exemplified by *Drosophila* DmPar3 binding to phosphatidylinositol  
80 4,5-bisphosphate (PI(4,5)P<sub>2</sub>, referred to hereafter as PIP<sub>2</sub> for simplicity) and  
81 phosphatidylinositol 3, 4,5-triphosphate (PI(4,5,6)P<sub>3</sub>, hereafter PIP<sub>3</sub>) (Krahn et al.,  
82 2010). Furthermore, human Cdc42 binds to PIP<sub>2</sub> (Johnson et al., 2012). Overall,  
83 whereas it is clear that phospholipids can bind PARs and interacting proteins in some  
84 contexts, their subcellular distribution and potential function in an asymmetrically  
85 dividing system such as the *C. elegans* zygote remain unclear.

86 PIP<sub>2</sub> is the most abundant of seven phosphorylated phosphatidylinositols and  
87 is present mostly in the inner leaflet of the plasma membrane, as revealed for  
88 instance by the distribution of the pleckstrin homology (PH) domain of mammalian  
89 phospholipase C1δ1 (PLC1 δ1), which binds PIP<sub>2</sub> *in vitro* and in cells with high  
90 specificity (Garcia et al., 1995; Lemmon et al., 1995; Várnai and Balla, 1998). PIP<sub>2</sub> is  
91 mainly phosphorylated from phosphatidylinositol 4-phosphate PI(4)P (PIP) by Type I  
92 PI(4)P5-kinases (PIP5K1), and can be further phosphorylated to PIP<sub>3</sub> by  
93 Phosphatidylinositol 3-kinases (PI3K). Conversely, PIP<sub>2</sub> can be dephosphorylated by  
94 5-phosphatases, including OCRL and synaptojanin (reviewed in Brown, 2015; De  
95 Craene et al., 2017; McLaughlin et al., 2002). Amongst other roles, in systems from  
96 *S. cerevisiae* to *H. sapiens*, PIP<sub>2</sub> helps link the F-actin cortical network to the plasma  
97 membrane, as well as stimulate F-actin assembly and reorganization. The latter  
98 function is achieved notably by activating, together with Cdc42, WASP family  
99 proteins that, in turn, activate the actin nucleator Arp2/3. Moreover, PIP<sub>3</sub> further  
100 activates WASP family proteins through RhoGTPase GEFs (reviewed in Brown,  
101 2015; De Craene et al., 2017; Di Paolo and De Camilli, 2006; McLaughlin et al.,  
102 2002; Wu et al., 2014; Yin and Janmey, 2003; Zhang et al., 2012). Whether and, if  
103 so, how, PIP<sub>2</sub> regulates cortical actomyosin network organization in the *C. elegans*  
104 embryo is not known.

105 Not only is the potential function of PIP<sub>2</sub> in the *C. elegans* zygote not clear, but  
106 the same holds for PIP<sub>2</sub> subcellular distribution. In other systems, PIP<sub>2</sub> can distribute  
107 unevenly in the plasma membrane, for instance accumulating in macrodomains in  
108 nascent phagosomes, in membrane ruffles or at the leading edge of motile cells,



109 which all exhibit curved membranes that are sites of actin reorganization (Chierico et  
110 al., 2015; McLaughlin et al., 2002; Zhang et al., 2012). Accordingly, PIP<sub>2</sub> can  
111 stimulate actin polymerization in curved but not flat model membranes (Gallop et al.,  
112 2013). Interestingly, PIP<sub>2</sub> patches assemble at the leading edge of neuronal PC12  
113 cells prior to F-actin patch accumulation, but their formation also depends on F-actin  
114 (Golub and Caroni, 2005; Golub and Pico, 2005). Moreover, it was suggested that F-  
115 actin enrichment in cell cortices drives clustering of PIP<sub>2</sub>-containing macrodomains,  
116 which in turn further regulate actin polymerization and branching (reviewed in Chichili  
117 and Rodgers, 2009). Overall, PIP<sub>2</sub> and F-actin polymerization function in a positive  
118 feedback mechanism in several systems.

119         The single PIP5K1 in *C. elegans* is PPK-1, which can synthesize PIP<sub>2</sub> from  
120 PIP *in vitro* and *in vivo* (Weinkove et al., 2008). Overexpression of PPK-1 in  
121 developing worm neurons increases the level of PIP<sub>2</sub> and results in extended  
122 filopodial-like structures, probably through changes in the actin cytoskeleton  
123 (Weinkove et al., 2008). In the somatic gonad, PPK-1 is important for F-actin  
124 cytoskeletal reorganization and, therefore, gonad contractility (Xu et al., 2007).  
125 Moreover, PPK-1 is enriched on the posterior cortex of one-cell embryos and has  
126 been reported to be important for asymmetric spindle positioning, but not for cell  
127 polarity (Panbianco et al., 2008). In other systems, however, PIP<sub>2</sub> can regulate cell  
128 polarity through its ability to recruit PAR proteins and reorganize the actin  
129 cytoskeleton. Thus, in the *Drosophila* follicular epithelium, PIP<sub>2</sub> recruits DmPar3 to  
130 the apical plasma membrane to maintain apical-basal polarity (Claret et al., 2014).  
131 Moreover, PIP<sub>2</sub> might mediate interactions between PAR proteins, the actomyosin  
132 network and the plasma membrane in the fly oocyte (Gervais et al., 2008), as well as  
133 regulate apical constriction in the fly embryo (Guglielmi et al., 2015). Motile cells such  
134 as mammalian neutrophils or *Dictyostelium discoideum* also rely on PIP<sub>2</sub>, together  
135 with PIP<sub>3</sub>, for actin network reorganization and polarization (reviewed in Wu et al.,  
136 2014). To summarize, in many systems, PIP<sub>2</sub> is essential for F-actin reorganization  
137 and cell polarization, but it remains to be investigated whether this is the case in the  
138 developing *C. elegans* embryo.

## 139 Results

### 140 The PIP<sub>2</sub> biomarker GFP::PH<sup>PLC1δ1</sup> is present in dynamic polarized cortical 141 structures in one-cell *C. elegans* embryos

142 While monitoring the distribution of components involved in asymmetric division of  
143 the *C. elegans* zygote with confocal spinning disk microscopy, we found that the PIP<sub>2</sub>  
144 biomarker GFP::PH<sup>PLC1δ1</sup> (Audhya et al., 2005) forms distinct and dynamic structures  
145 at the cell cortex (Fig. 1A-J; Fig. S1A; Movie 1). Initially, when the cortical actomyosin  
146 network is contractile throughout the embryo, PIP<sub>2</sub> is present weakly and evenly on  
147 the cell cortex (data not shown). Thereafter, when the actomyosin network begins to  
148 retract towards the anterior at the onset of polarity establishment, we observed the  
149 appearance of striking elongated cortical structures enriched in PIP<sub>2</sub>, primarily on the  
150 anterior side of the embryo (Fig. 1A, B, 1K; Fig. S1A, top). Such PIP<sub>2</sub> cortical  
151 structures have an average size of ~2.5 μm<sup>2</sup> and further elongate over time as the  
152 cell progresses through the cell cycle (Fig. 1L, M). Subsequently, all elongated PIP<sub>2</sub>  
153 cortical structures move anteriorly so that they become distributed in a clearly  
154 polarized manner at pseudocleavage, which marks the end of the polarity  
155 establishment phase (Fig. 1C, D, arrow). At this time, PIP<sub>2</sub> structures cover ~15% of  
156 the anterior cortical surface (Fig. 1K). During the centration/rotation stage that  
157 follows, PIP<sub>2</sub> cortical structures first decrease in size (Fig. 1E, F, arrowhead), with  
158 most of them disappearing completely but some remaining as small foci by the time  
159 the cell enters mitosis (Fig. 1G, H, arrowheads). A few elongated cortical structures  
160 reappear during cytokinesis, primarily in the embryo anterior (Fig. 1I, J). In contrast to  
161 the discrete structures visible when imaging the cortical plane, PIP<sub>2</sub> entities are  
162 barely detectable in the embryo middle plane (Fig. S1A, bottom), likely explaining  
163 why they were not reported previously (Audhya et al., 2005; Blanchoud et al., 2010;  
164 Panbianco et al., 2008).

165 We set out to verify the cortical distribution revealed by GFP::PH<sup>PLC1δ1</sup> using  
166 fluorescently labeled synthetic PIP<sub>2</sub>. To this end, we delivered Bodipy-FL-PIP<sub>2</sub> lipids  
167 to embryos whose eggshell had been permeabilized using *perm-1(RNAi)* (Carvalho  
168 et al., 2011). Although there was a high background of fluorescent lipids outside the  
169 embryo, we found that Bodipy-FL-PIP<sub>2</sub> distributes in cortical structures marked by  
170 mCherry::PH<sup>PLC1δ1</sup> (Fig. S1B, C). Overall, we conclude that PIP<sub>2</sub> forms dynamic and  
171 polarized structures at the plasma membrane of one-cell *C. elegans* embryos.

## 172 **A-P polarity cues regulate the polarized distribution of PIP<sub>2</sub> cortical structures**

173 We set out to address what regulates the polarized distribution of PIP<sub>2</sub> cortical  
174 structures, which is particularly apparent during the pseudocleavage stage, as  
175 evidenced also by the fact that they do not overlap with GFP::PAR-2, which marks  
176 the posterior cortical domain (Fig. 2A). By contrast, we found that PIP<sub>2</sub> cortical  
177 structures overlap with the anterior polarity domain harboring GFP::PAR-6 (Fig. 2B;  
178 Movie 2). Moreover, we observed that PIP<sub>2</sub> cortical structures overlap only with  
179 elongated GFP::PAR-6 cortical structures (Fig. 2B, arrow), but not with GFP::PAR-6  
180 foci (Fig. 2B, arrowhead), which are two distinct cortical populations of GFP::PAR-6  
181 previously reported to exist (Beers and Kemphues, 2006; Robin et al., 2014;  
182 Rodriguez et al., 2017; Wang et al., 2017).

183 We next tested whether the polarized distribution of PIP<sub>2</sub> cortical structures  
184 depends on A-P polarity cues. In contrast to the polarized distribution observed in the  
185 control condition, we found that upon *par-3(RNAi)*, PIP<sub>2</sub> cortical structures distribute  
186 essentially uniformly over the cell cortex (compare Fig. 2C, D with 2E, F), except for  
187 the very posterior of the embryo, consistent with the known slight posterior clearing of  
188 the actomyosin network upon PAR-3 inactivation (Kirby et al., 1990; Munro et al.,  
189 2004). Furthermore, we found that upon *par-2(RNAi)*, PIP<sub>2</sub> cortical structures first  
190 move anteriorly (Fig. 2G, H), but then become distributed in a more uniform manner  
191 (Fig. 2H), in line with PAR-2 being dispensable for polarity establishment, but  
192 essential for polarity maintenance (Cuenca et al., 2003; Hao et al., 2006; Munro et  
193 al., 2004). Together, these findings establish that the asymmetric distribution of PIP<sub>2</sub>  
194 cortical structures is regulated by PAR-dependent A-P polarity cues.

195

## 196 **PIP<sub>2</sub> cortical structures colocalize partially with actin and fully with ECT-2,** 197 **RHO-1 and CDC-42**

198 Since PIP<sub>2</sub> and F-actin are interdependent in many systems, we tested whether  
199 these two components overlap at the cell cortex of *C. elegans* embryos. As shown in  
200 Figure 3A and Movie 3, we found a partial overlap of Lifeact::mKate-2, which  
201 monitors F-actin, and of PIP<sub>2</sub> cortical structures marked by mNeonGreen::PH<sup>PLC151</sup>  
202 (mNG::PH<sup>PLC151</sup>). By contrast, we detected no substantial overlap between  
203 mCherry::PH<sup>PLC151</sup> and GFP::NMY-2 (Fig. 3B; Movie 4), the non-muscle myosin that

204 powers contractions of the cortical actomyosin network (Guo and Kemphues, 1996;  
205 Munro et al., 2004). Strikingly, in addition, we found that PIP<sub>2</sub> cortical structures  
206 marked by mCherry::PH<sup>PLC1δ1</sup> fully colocalize with GFP::ECT-2, GFP::RHO-1 and  
207 GFP::CDC-42 (Fig. 2C-E; Movie 5). Overall, we conclude that PIP<sub>2</sub> cortical structures  
208 colocalize partially with F-actin, as well as completely with the actomyosin network  
209 regulators ECT-2, RHO-1 and CDC-42 in the one-cell *C. elegans* embryo.

210

## 211 **PIP<sub>2</sub> cortical structures and the F-actin cytoskeleton move in concert**

212 Live imaging of embryos expressing both Lifeact::mKate-2 and mNG::PH<sup>PLC1δ1</sup>  
213 suggested that movements of PIP<sub>2</sub> cortical structures and of the F-actin network are  
214 somehow coupled, as drastic changes in PIP<sub>2</sub> cortical structures coincide with  
215 alterations in the actomyosin network across the first cell cycle (Movie 3). To  
216 investigate this potential coupling in a quantitative manner, we used particle image  
217 velocimetry (PIV) to analyze cortical flows of Lifeact::mKate-2 and mNG::PH<sup>PLC1δ1</sup> in  
218 the same embryo during polarity establishment (Fig. 4A-C) (Thielicke and Stamhuis,  
219 2014). This analysis revealed highly correlated local flow velocities at each time point  
220 (Fig. 4B; Fig. S2A; Pearson coefficient  $\rho = 0.61$ ,  $p < 0.0001$ ). Moreover, the direction  
221 of flow vectors at each time point is very similar (Fig. 4C; Fig. S2B;  $\theta_{\text{cut off}} = 38^\circ$   
222  $p < 0.0001$ , Material and Methods). Analogous findings were made when comparing  
223 mCherry::PH<sup>PLC1δ1</sup> and GFP::CDC-42 (Fig. S2C). By contrast, no strong correlation  
224 was found between mCherry::PH<sup>PLC1δ1</sup> and the caveolin marker CAV-1::GFP (Fig.  
225 S2C), which has been suggested to mark lipid rafts in *C. elegans* (Entchev and  
226 Kurzchalia, 2005; Kurzchalia and Ward, 2003; Kurzchalia et al., 1999; Merris et al.,  
227 2003). Together, these results demonstrate that cortical movements of PIP<sub>2</sub> cortical  
228 structures and the F-actin network are coupled.

229 We next addressed whether the movements of PIP<sub>2</sub> cortical structures and of  
230 F-actin are synchronous or instead exhibit a time shift that might suggest a potential  
231 hierarchy between them, with one component leading the other. Close examination  
232 of movies of embryos expressing Lifeact::mKate-2 and mNG::PH<sup>PLC1δ1</sup> suggested  
233 that PIP<sub>2</sub> cortical structures move slightly ahead of cortical F-actin (Fig. 4E; Movie 6).  
234 To address this possibility quantitatively, we cross-correlated time-shifted images of  
235 Lifeact::mKate-2 and of mNG::PH<sup>PLC1δ1</sup> to determine when there is maximal overlap  
236 between the two signals. As shown in Figure 4D, this analysis revealed that maximal

237 correlation is achieved when mNeGr::PH<sup>PLC1 $\delta$ 1</sup> is on average  $\sim 9.3 \pm 1.5$  seconds  
238 ahead of Lifeact::mKate-2. Overall, we conclude that PIP<sub>2</sub> cortical structures move  
239 together with, but slightly ahead of, F-actin filaments.

240 What drives these movements of PIP<sub>2</sub> cortical structures? The observation  
241 that PIP<sub>2</sub> cortical structures move slightly ahead of F-actin filaments, with the trailing  
242 end of PIP<sub>2</sub> cortical structure being seemingly in contact with the leading tip of  
243 coupled actin filaments (see Fig. 4E), led us to hypothesize that actin polymerization  
244 might push PIP<sub>2</sub> cortical structures. Compatible with this possibility, we found that the  
245 average velocity of PIP<sub>2</sub> cortical structures was  $\sim 0.17 \pm 0.03$   $\mu\text{m/s}$  (Fig. S2D, E), in  
246 the range of actin polymerization driven motility in other systems (Brangbour et al.,  
247 2011; Cameron et al., 2000; Carlsson, 2003; Carlsson, 2010; Mogilner and Oster,  
248 1996). These findings lead us to propose that the movements of PIP<sub>2</sub> cortical  
249 structures are driven by actin polymerization.

250

### 251 **PIP<sub>2</sub> cortical structures depend on F-actin**

252 Given notably the tight coupling between cortical PIP<sub>2</sub> structures and F-actin, we  
253 investigated whether components of the actomyosin network regulate the presence  
254 of PIP<sub>2</sub> entities. As shown in Figure 4F, we found that PIP<sub>2</sub> cortical structures form  
255 and move unabated in *nmy-2(RNAi)* embryos, in which actomyosin network  
256 contractility is abolished, although they distribute symmetrically, as expected from the  
257 known requirement of NMY-2 in A-P polarity (Fig. 4F, G). Therefore, formation and  
258 movement of PIP<sub>2</sub> cortical structures do not depend on a contractile actomyosin  
259 cortex. In stark contrast, we found that PIP<sub>2</sub> cortical structures hardly form in *act-*  
260 *1(RNAi)* embryos (Fig. 4G, H, I; Fig. S3A-D). Moreover, acute impairment of F-actin  
261 through treatment of *perm-1(RNAi)* embryos with the actin polymerization inhibitor  
262 Cytochalasin D led to the disappearance of PIP<sub>2</sub> cortical structures (Fig. S3E, F). By  
263 contrast, we found that PIP<sub>2</sub> cortical structures are essentially independent of the  
264 microtubule cytoskeleton, impaired here using *tba-2(RNAi)* (Fig. 4J, K). Overall, we  
265 conclude that the formation of PIP<sub>2</sub> cortical structures depends on F-actin.

266

## 267 **Lowering the cellular level of PIP<sub>2</sub> impacts F-actin distribution**

268 We set out to address whether, conversely, PIP<sub>2</sub> regulates F-actin organization. If  
269 this were the case, then changing the level of PIP<sub>2</sub> should alter actomyosin network  
270 organization. We tested this prediction first by depleting PIP<sub>2</sub>. To this end, we  
271 activated phospholipase C, an enzyme that cleaves PIP<sub>2</sub>, by delivering Ionomycin  
272 and Ca<sup>2+</sup> into *perm-1(RNAi)* embryos (Fig. S4A) (Hammond et al., 2012; Várnai and  
273 Balla, 1998). Cleavage of PIP<sub>2</sub> at the plasma membrane was monitored by the  
274 gradual loss of GFP::PH<sup>PLC1 $\delta$ 1</sup> plasma membrane signal, which enabled us to  
275 determine, in each embryo, a comparable time  $t_{1/2}$  when half of the initial  
276 GFP::PH<sup>PLC1 $\delta$ 1</sup> plasma membrane fluorescence signal disappeared (Fig. S4B, C). A  
277 single plane in the middle of embryos expressing GFP::PH<sup>PLC1 $\delta$ 1</sup> and Lifeact::mKate-  
278 2 was monitored in these experiments, as this proved most reliable for determining  
279  $t_{1/2}$ . In doing so, we found that PIP<sub>2</sub> removal following addition of Ionomycin/ Ca<sup>2+</sup>  
280 during pseudocleavage led to rapid alteration of embryo shape on the anterior side,  
281 coincident with altered F-actin organization (compare Fig. 5A and 5B, Fig. S4E). An  
282 analogous alteration in F-actin distribution was observed following Ionomycin/ Ca<sup>2+</sup>  
283 addition during mitosis (Fig. 5C; Movie 7).

284 To test whether the shape change observed following Ionomycin/ Ca<sup>2+</sup> addition  
285 is caused by alterations in F-actin organization, we combined this treatment with the  
286 actin depolymerizing agent Latrunculin A. As shown in Figure S4F and Movie 8, we  
287 found that this results in normally shaped embryos. Therefore, shape changes  
288 following PIP<sub>2</sub> removal are F-actin dependent. Together, these results uncover that a  
289 normal PIP<sub>2</sub> level is critical for the proper distribution of F-actin and thus for proper  
290 shape of the *C. elegans* zygote.

291

## 292 **Increasing the cellular level of PIP<sub>2</sub> also impacts F-actin distribution**

293 We sought to test the relationship between PIP<sub>2</sub> and F-actin further by increasing the  
294 level of PIP<sub>2</sub>. We investigated whether this could be achieved by altering individual  
295 enzymes from the PIP<sub>2</sub> biosynthetic pathway using RNAi or mutant worms, but failed  
296 to find a single condition where this would be the case (see Table S1 for genes  
297 targeted in this study). Therefore, we set out to jointly inactivate OCRL-1 and UNC-  
298 26 for the following reasons (Fig. S4A). OCRL-1 is an inositol 5-phosphatase that



299 hydrolyzes PIP<sub>2</sub> to phosphatidyl 4-phosphate (PIP), and whose depletion leads to  
300 increased level of PIP<sub>2</sub> on *C. elegans* phagosomes (Cheng et al., 2015). Moreover,  
301 UNC-26 is the *C. elegans* homologue of Synaptojanin, a polyphosphoinositide  
302 phosphatase that can also hydrolyze PIP<sub>2</sub> to PIP, and whose impairment results in  
303 vesicle trafficking defects and cytoskeletal abnormalities in the worm nervous system  
304 (Charest et al., 1990; Harris et al., 2000).

305 We jointly depleted the function of these two PIP<sub>2</sub> phosphatases, using RNAi  
306 for *ocrl-1* and an extant mutant for *unc-26*. Importantly, we found by comparing  
307 cortical mCherry-PH<sup>PLC1 $\delta$ 1</sup> mean intensity values that *ocrl-1(RNAi) unc-26(s1710)*  
308 embryos exhibit an increased overall level of PIP<sub>2</sub> (Fig. S5A, B). Importantly, in  
309 addition, we found that this leads to drastic alterations in PIP<sub>2</sub> and F-actin cortical  
310 structures monitored by GFP::PH<sup>PLC1 $\delta$ 1</sup> and Lifeact::mKate-2 (compared Fig. 5D and  
311 Fig. 5E-F; Fig. S5C-H). First, in addition to motile PIP<sub>2</sub> structures, we found a  
312 population of immotile PIP<sub>2</sub> clusters residing between the eggshell and the plasma  
313 membrane (Fig. 5E, H, K, arrow; Fig. S5I, arrowhead), potentially corresponding to  
314 PIP<sub>2</sub> boluses removed from the cell in an attempt to return to homeostatic conditions.  
315 Second, we found that motile PIP<sub>2</sub> structures do not disappear as readily after  
316 pseudocleavage as they do normally (Fig. 5H, I, compare to Fig. 5G; Fig. S5D).  
317 Third, we found that motile PIP<sub>2</sub> structures exhibit altered distribution in all *ocrl-*  
318 *1(RNAi) unc-26(s1710)* embryos (Fig. 5E, F; Fig. S5F, H). In some (hereafter referred  
319 as class I embryos, N=27/48), the anterior movements of PIP<sub>2</sub> cortical structures and  
320 of the actomyosin network do not stop at pseudocleavage, but instead continue until  
321 the end of mitosis, resulting in a very small anterior domain of PIP<sub>2</sub> and F-actin  
322 cortical structures (compare to Fig. 5G, J to Fig. 5H, K; Movie 9). In class II *ocrl-*  
323 *1(RNAi) unc-26(s1710)* embryos (N=21/48), weak anteriorly directed movement of  
324 cortical PIP<sub>2</sub> and F-actin is initiated, but both components become distributed  
325 throughout the cortex by the end of the first cell cycle, except at the very posterior  
326 (Fig. 5I, L). Whereas a clear cytokinesis furrow formed in all class 1 embryos, this  
327 was the case in only 8/21 class 2 embryos; this subset exhibited more pronounced  
328 anteriorly directed movements than the other 13. Overall, we conclude that the extent  
329 of PIP<sub>2</sub> 5-phosphatases depletion is stronger in class 2 than in class 1 embryos, with  
330 the severe phenotype in the former perhaps reflecting an impact on multiple cellular  
331 processes. Regardless, these findings establish that an increase in the level of PIP<sub>2</sub>  
332 as achieved in class 1 embryos leads to sustained cortical flows towards the anterior



333 side. Moreover, these results further demonstrate that PIP<sub>2</sub> regulates actin  
334 cytoskeletal organization in one-cell *C. elegans* embryos.

335

### 336 **An appropriate level of PIP<sub>2</sub> is essential for proper PAR polarity establishment** 337 **and maintenance**

338 It is well known that the actomyosin network is essential for the establishment phase  
339 of A-P polarization of the *C. elegans* zygote (Guo and Kemphues, 1996; Hill and  
340 Strome, 1988; Hill and Strome, 1990; Munro et al., 2004; Severson and Bowerman,  
341 2003; Shelton et al., 1999). Given that a proper level of PIP<sub>2</sub> is essential for correct  
342 actomyosin network organization, we tested whether it is also important for A-P  
343 polarity. To this end, we investigated the impact of excess PIP<sub>2</sub> on polarity using *ocr1-*  
344 *1(RNAi) unc-26(s1710)* embryos expressing mCherry::PH<sup>PLC1 $\delta$ 1</sup> and GFP::PAR-2 or  
345 GFP::PAR-6, respectively (Fig. 6A-L). We found that the distribution of GFP::PAR-2  
346 and GFP::PAR-6 domains changes in a manner consistent with alterations in motile  
347 PIP<sub>2</sub> structures and the F-actin network, and this from early on (Movie 10). Thus, for  
348 GFP::PAR-6, either a small domain formed on the very anterior (Fig. 6B, E; class 1,  
349 N=5/9; Movie 10) or else the fusion protein remained present over the entire cortex,  
350 except on the very posterior (Fig. 6C,F class 2; N=4/9). As expected, GFP::PAR-2  
351 distributed in a reciprocal manner, either expanding drastically towards the anterior  
352 (Fig. 6H, K; class 1, N=12/22; Movie 11) or else remaining restricted to the very  
353 posterior (Fig. 6I, L; class 2, N=10/22). Together, these results indicate that a correct  
354 level of PIP<sub>2</sub> is needed for proper F-actin network localization and, presumably as a  
355 consequence, appropriate PAR polarity.

356 In the above experiments, the level of PIP<sub>2</sub> was in excess from the beginning  
357 of development, such that one could not distinguish whether the impact on polarity  
358 reflected a role strictly during the establishment phase or during both establishment  
359 and maintenance phases. We reasoned that one could test specifically a potential  
360 role for polarity maintenance by adding Ionomycin and Ca<sup>2+</sup> to *perm-1(RNAi)*  
361 embryos expressing mCherry::PH<sup>PLC1 $\delta$ 1</sup> and GFP::PAR-2 after the establishment  
362 phase. We found that the GFP::PAR-2 domain is unaltered at t<sub>1/2</sub> (compare Fig. 6M  
363 and 6N, O), even though F-actin is already changed at that moment (see Fig. 5B, C).  
364 Importantly, in addition, we found that the GFP::PAR-2 domain expands slowly  
365 towards the anterior starting ~3 min thereafter (Fig. 6N, bottom two panels), with the

366 pseudocleavage furrow moving anteriorly initially, and then either retracting (Fig. 6M,  
367 N; Movie 12, N=6/14), or else remaining at the very anterior until the end of the first  
368 cell cycle (Movie 13; N=8/14). Mirroring the findings at pseudocleavage, we found  
369 that if  $t_{1/2}$  occurs at nuclear envelope breakdown (NEBD), the GFP::PAR-2 domain  
370 likewise expands slowly towards the anterior (Fig. 6O; Movie 14). Together these  
371 results indicate that an appropriate level of PIP<sub>2</sub> is essential for proper PAR polarity  
372 also during the maintenance phase.

373 In principle, PIP<sub>2</sub> could alter PAR polarity during the maintenance phase  
374 through an impact on F-actin organization or else via an actin-independent role. A  
375 potential role of F-actin in polarity maintenance is somewhat controversial, in contrast  
376 to its well known role during polarity establishment (Goehring et al., 2011; Hill and  
377 Strome, 1990; Liu and Fletcher, 2006; Severson and Bowerman, 2003). In the light of  
378 our findings with PIP<sub>2</sub> level alterations, we set out to directly test whether F-actin  
379 plays a role in polarity maintenance, first by adding Cytochalasin D to *perm-1(RNAi)*  
380 embryos expressing Lifeact::mKate-2 and GFP::PAR-2, after polarity establishment  
381 (Fig. 7A, B). Consistent with previous studies (Goehring et al., 2011; Hill and Strome,  
382 1990), we found that Cytochalasin D addition at this stage does not alter the  
383 GFP::PAR-2 domain in a major manner (Fig. 7A, B; Movie 15). However, we found  
384 also that Cytochalasin D treatment does not fully disrupt F-actin, as clumps of  
385 Lifeact::mKate-2 remain present on the embryo anterior (Fig. 7B). We hence turned  
386 to inhibiting F-actin polymerization using Latrunculin A, which resulted in a total  
387 depletion of F-actin (Fig. 7C; N=12; Movie 16). We observed membrane  
388 invaginations that remove GFP::PAR-2 from the cortex into cytoplasmic aggregates  
389 (Fig. 7C, arrowhead), as reported by others (Goehring et al., 2011; Redemann et al.,  
390 2010). Importantly, in addition, we monitored changes in GFP::PAR-2 distribution not  
391 as a function of drug addition time, as in earlier work (Goehring et al., 2011), but of  
392 the time  $t_{1/2}$  at which half of the Lifeact::mKate-2 fluorescence disappeared from the  
393 membrane. In doing so, we found that the size of the GFP::PAR-2 domain decreased  
394 significantly after  $t_{1/2}$  in all embryos analyzed (Fig. 7C, bottom; N=12). As reported in  
395 Figure S5J, we found that the  $t_{1/2}$  of Lifeact::mKate-2 and of GFP::PAR-2  
396 disappearance are highly correlated (Pearson coefficient  $\rho=0.86$ ;  $p=0.0014$ ). This  
397 finding reinforces the conclusion that F-actin is critical not only for the establishment,  
398 but also for the maintenance of PAR polarity.

399 Overall, we uncovered that a proper level of PIP<sub>2</sub> is essential for correct sizing  
400 of PAR domains presumably through reorganization of F-actin, not only during  
401 polarity establishment but also during polarity maintenance phase.

402

## 403 **Discussion**

404 In this work, we demonstrate that PIP<sub>2</sub> forms cortical structures in the one-cell *C.*  
405 *elegans* embryo. We show that these structures depend on F-actin and, reciprocally,  
406 that PIP<sub>2</sub> regulates F-actin organization, revealing an interdependence of these two  
407 components in the worm zygote (Fig. 7D). Moreover, likely through its impact on the  
408 actin cytoskeleton, PIP<sub>2</sub> is also needed for the correct sizing of anterior and posterior  
409 PAR domains, demonstrating for the first time that a plasma membrane lipid  
410 component participates in setting A-P polarity in the *C. elegans* embryo.

411

### 412 **PIP<sub>2</sub> is present in discrete cortical structures in *C. elegans* zygotes**

413 The distribution and dynamics of PIP<sub>2</sub> at the plasma membrane of early *C. elegans*  
414 embryos were not clear prior to this work, primarily because the middle embryo plane  
415 has been analyzed in most past investigations. Here, we developed cortical imaging  
416 conditions to assay subcellular distributions at the cortex, the very location where the  
417 function of PAR proteins and components critical for asymmetric division is exerted.  
418 In doing so, we discovered that PIP<sub>2</sub> is present in dynamic polarized cortical  
419 structures marked by the PIP<sub>2</sub> biomarker GFP::PH<sup>PLC1δ1</sup>, in line with recent  
420 observations mentioning a non-uniform distribution of this fusion protein (Rodriguez  
421 et al., 2017; Wang et al., 2017). Although patches of plasma membrane enriched in  
422 PIP<sub>2</sub> have been observed in other systems (Chierico et al., 2015; Golub and Caroni,  
423 2005; McLaughlin et al., 2002; Zhang et al., 2012), the stereotyped progression  
424 through the first cell cycle of the large *C. elegans* zygote enabled us to uncover their  
425 distribution and dynamics with unprecedented resolution. Why were such remarkable  
426 structures not observed in previous studies in the worm? In addition to the fact that  
427 they are not noticeable when imaging the middle plane of the embryo, other plausible  
428 reasons include that PIP<sub>2</sub> cortical structures appear only transiently during the cell  
429 cycle and that they are not preserved upon fixation (data not shown).

430 How do PIP<sub>2</sub> cortical structures assemble? We hypothesize that PIP<sub>2</sub> cortical  
431 structures form by redistribution of existing PIP<sub>2</sub> rather than by *de novo* synthesis  
432 through the PIP5K1 PPK-1, and this for two reasons. First, PIP<sub>2</sub> in other systems has  
433 been suggested to diffuse much faster than it is synthesized (McLaughlin et al.,  
434 2002), such that potential local synthesis is unlikely to dictate restricted PIP<sub>2</sub>

435 localization. Second, PPK-1, the sole PIP5K1 in *C. elegans*, is enriched in the  
436 posterior of the embryo (Panbianco et al., 2008), away from the location where most  
437 PIP<sub>2</sub> cortical structures are. Interestingly, we find also that PIP<sub>2</sub> cortical structures  
438 form and move independently of actomyosin contractions, as evidenced by their  
439 unchanged presence and behavior upon NMY-2 depletion (data not shown).  
440 Nevertheless, it remains possible that PIP<sub>2</sub> cortical structures form at membrane  
441 protrusions or ruffles, which would be consistent with the finding that PIP<sub>2</sub> can  
442 stimulate F-actin polymerization in curved but not in flat membranes (Gallop et al.,  
443 2013), and with PIP<sub>2</sub> accumulating in membrane ruffles, nascent phagosomes and  
444 the leading edge of motile cells (reviewed in McLaughlin et al., 2002; Zhang et al.,  
445 2012). Overall, we propose that, in the *C. elegans* zygote, PIP<sub>2</sub> cortical structures  
446 form through the redistribution of existing PIP<sub>2</sub> at the plasma membrane, perhaps  
447 preferentially at membrane protrusions or ruffles.

448

#### 449 **Interdependence of PIP<sub>2</sub> and F-actin**

450 PIP<sub>2</sub> and F-actin exhibit a reciprocal relationship in a number of systems, and we  
451 uncover here that this is the case also in *C. elegans* embryos. We found that PIP<sub>2</sub>  
452 cortical structures and F-actin movements are coupled, with PIP<sub>2</sub> structures moving  
453 slightly ahead of F-actin filaments, at velocities compatible with actin polymerization  
454 driving their movements. This leads us to propose that actin polymerization pushes  
455 PIP<sub>2</sub> cortical structures, in a manner reminiscent of other actin-dependent motility  
456 processes such as that of *Listeria monocytogenes* (reviewed in Mogilner and Oster,  
457 1996). While being pushed ahead of F-actin filaments in *C. elegans*, PIP<sub>2</sub> structures  
458 might recruit factors promoting actin polymerization and branching, such as ECT-1,  
459 RHO-1 and CDC-42, thus guiding proper F-actin network reorganization, in line with  
460 suggestions in other systems (reviewed in Chichili and Rodgers, 2009). Intriguingly,  
461 the distribution of a biosensor that detects active RhoA overlaps with that of NMY-2  
462 foci (Reymann et al., 2016; Tse et al., 2012). Given that we show here that PIP<sub>2</sub>  
463 cortical structures do not overlap with NMY-2, while they do overlap with GFP::RHO-  
464 1, perhaps the bulk of RHO-1 associating with PIP<sub>2</sub> cortical structures is not active.  
465 Alternatively, given that we show here that RHO-1 colocalizes with its activating GEF  
466 ECT-2, perhaps the RhoA biosensor used previously does not detect all active  
467 RHO-1 species. Furthermore, it is interesting to note that non-muscle myosin 2 plays

468 a role in actin network disassembly in fish keratinocytes (Wilson et al., 2010).  
469 Extrapolating from this observation, it is tempting to speculate that PIP<sub>2</sub>, by promoting  
470 F-actin assembly, and NMY-2, by promoting F-actin disassembly, in addition to its  
471 role in network contractility, may together ensure proper F-actin dynamics in the early  
472 *C. elegans* embryo.

473

#### 474 **PIP<sub>2</sub> and PAR-dependent polarity**

475 PAR proteins are also distributed unevenly within their cortical domain. For instance,  
476 PAR-6 exists in two cortical populations, one diffuse that depends on CDC-42, and  
477 one punctate that colocalizes with PAR-3 (Beers and Kemphues, 2006; Robin et al.,  
478 2014). Moreover, PAR-3 forms clusters that are crucial for proper polarity and that  
479 assemble in a manner dependent on PCK-3, CDC-42, as well as actomyosin  
480 contractility (Rodriguez et al., 2017; Wang et al., 2017). Intriguingly, we find that PIP<sub>2</sub>  
481 cortical structures colocalize within the more diffuse cortical PAR-6 protein  
482 population, the one lacking PAR-3 (Beers and Kemphues, 2006; Robin et al., 2014;  
483 Rodriguez et al., 2017; Wang et al., 2017). We establish here that increasing the  
484 level of PIP<sub>2</sub> augments the segregation of both PAR-6 populations to the embryo  
485 anterior, potentially because cortical clustering of PAR-3 depends on the actomyosin  
486 cytoskeleton and cortical tension (Beers and Kemphues, 2006; Robin et al., 2014;  
487 Rodriguez et al., 2017; Wang et al., 2017). Overall, we propose that increasing the  
488 level of PIP<sub>2</sub> might augment cortical tension, which could in turn promote PAR-3  
489 clustering and thereby aid segregation.

490 We show that a correct PIP<sub>2</sub> level is essential for proper polarity establishment  
491 and maintenance through correct positioning of GFP::PAR-2 and GFP::PAR-6  
492 domains. When increasing the level of PIP<sub>2</sub>, the continued movement of PAR  
493 domains towards the anterior until the end of mitosis alters their relative size. This is  
494 reminiscent of changes in the size of PAR domains that occur upon RGA-3/4  
495 depletion (Schonegg et al., 2007). However, although *rga-3/4(RNAi)* embryos exhibit  
496 a hypercontractile actomyosin network, this is not the case of embryos with increased  
497 PIP<sub>2</sub> level. We thus propose that actomyosin contractility regulated by NMY-2 and F-  
498 actin organization regulated by PIP<sub>2</sub> contribute in concert to correct movements of the  
499 actomyosin network, and, therefore, proper sizing of PAR-polarity domains.

500

501 **On the role of the actomyosin network in polarity establishment and**  
502 **maintenance**

503 The actomyosin network plays a well-established role during polarity establishment,  
504 whereas its role during polarity maintenance has been less clear (Goehring et al.,  
505 2011; Hill and Strome, 1990; Liu and Fletcher, 2006; Severson and Bowerman,  
506 2003). Our results, together with that of others, indicate that the actomyosin network  
507 regulates the size and localization of PAR domains in two ways. First, when the  
508 actomyosin network moves along the A-P embryonic axis, PAR domains alter their  
509 distribution accordingly. This relationship was clear prior to this work for the polarity  
510 establishment phase, and we show here that this is also the case during polarity  
511 maintenance. Second, actin has been suggested to play merely a passive role during  
512 the maintenance phase in preventing cortical PAR-2 removal through membrane  
513 invaginations driven by microtubules (Goehring *et al.*, 2011). We reveal here that the  
514 lack of this function can lead to the near total disappearance of cortical PAR-2,  
515 emphasizing the critical importance of actin also during the maintenance phase.

516 Overall, our results in the *C. elegans* zygote are consistent with the role of  
517 PIP<sub>2</sub> in F-actin reorganization and polarity in other organisms. Previous work in *C.*  
518 *elegans* showed that depletion of CSNK-1, which negatively regulates PPK-1  
519 localization, does not influence polarity at the end of the first cell cycle (Panbianco et  
520 al., 2008). Perhaps PPK-1 distribution plays only a minor role in regulating the  
521 cellular level of PIP<sub>2</sub> in the zygote, being dispensable for PIP<sub>2</sub> cortical structure  
522 formation. In this case, depleting an enzyme such as CSNK-1 that negatively  
523 regulates PPK-1 localization would not be expected to influence PIP<sub>2</sub> cortical  
524 distribution. Here, by contrast, we establish unequivocally that alterations in the level  
525 of PIP<sub>2</sub> impairs polarity establishment and maintenance during the first asymmetric  
526 division of *C. elegans* embryos.

527

528



## 529 **Material and Methods**

### 530 **Worm Strains**

531 Nematodes were maintained at 24°C using standard protocols (Brenner, 1974). The  
532 following worm strains were used: GFP::PH<sup>PLC1δ1</sup> (OD58, *unc-119(ed3)* III; ItIs38[*pie-*  
533 *1p::GFP::PH(PLC1delta1) + unc-119(+)*]) (Audhya et al., 2005); mCherry::PH<sup>PLC1δ1</sup>  
534 (OD70, *unc-119(ed3)* III; ItIs44[*pie-1p::mCherry::PH(PLC1delta1) + unc-119(+)*]V)  
535 (Audhya et al., 2005); GFP::PAR-2 (TH129) and GFP::PAR-6 (TH110) (Schonegg et  
536 al., 2007); GFP::NMY-2 (LP162, *nmy-2(cp13[nmy-2::gfp + LoxP])* I) (Dickinson et al.,  
537 2013); CAV-1::GFP (RT688, *unc-119(ed3)* III; pwIs281[CAV-1::GFP, *unc-119(+)*])  
538 (Sato et al., 2006); mNeonGreen::PH<sup>PLC1δ1</sup> (LP274, cpls45[*Pmex-*  
539 *5::mNeonGreen::PLCδ-PH::tbb-2 3'UTR + unc-119(+)*] II; *unc-119(ed3)* III), mKate-  
540 2::PH<sup>PLC1δ1</sup> (LP307, cpls54[*Pmex-5::mKate2::PLCδ-PH(A735T)::tbb-2 3'UTR + unc-*  
541 *119(+)*] II; *unc-119(ed3)* III) and mCherry::PH<sup>PLC1δ1</sup> (LP308, cpls55[*Pmex-5::mCherry-*  
542 *C1::PLCδ-PH::tbb-2 3'UTR + unc-119(+)*] II; *unc-119(ed3)* III) (Heppert et al., 2016);  
543 Lifeact::mKate-2 (strain SWG001) (Reymann et al., 2016); GFP::RHO-1 (SA115,  
544 *unc-119(ed3)* III; tjIs1[*pie-1::GFP::rho-1 + unc-119(+)*]) (Motegi et al., 2006);  
545 GFP::CDC-42 (SA131, *unc-119(ed3)* III; tjIs6[*pie-1p::GFP::cdc-42 + unc-119(+)*].)  
546 (Motegi and Sugimoto, 2006); GFP::ECT-2 (SA125, *unc-119(ed3)* III; tjIs4[*pie-*  
547 *1::GFP::ect-2 + unc-119(+)*]) (Motegi and Sugimoto, 2006); *unc-26(s1710)* (EG3027,  
548 *unc-26(s1710)* IV) (Charest et al., 1990); *age-1(m333)*, (DR722, *age-1(m333)/mnC1*  
549 *dpy-10(e128) unc-52(e444)* II) (Riddle, 1988). Crosses of worm strains were  
550 performed at 20°C to generate lines homozygote for all transgenes, which were then  
551 maintained at 24°C. For GFP::RHO-1 and mCherry::PH<sup>PLC1δ1</sup>, as well as  
552 GFP::PH<sup>PLC1δ1</sup> and Lifeact::mKate-2, worm lines were crossed and F1 progeny  
553 heterozygote for both transgenes imaged.

### 554 **RNAi**

555 RNAi-mediated deletion was performed essentially as described (Kamath et al.,  
556 2001), using bacterial feeding strains either from the Ahringer (Kamath et al., 2003)  
557 or the Vidal library (Rual et al., 2004) (gift from Jean-François Rual and Marc Vidal).  
558 RNAi for *par-2* (Ahringer), *par-3* (Ahringer), *nmy-2* (Ahringer), *act-1* (Vidal), *tba-2*  
559 (Vidal), and *ocrl-1* (Ahringer) was performed by feeding L3-L4 animals with bacteria  
560 expressing the corresponding dsRNA at 24°C for 20-26 hours. RNAi for *perm-1*  
561 (Ahringer) was performed by feeding L4 and young adults with bacteria expressing

562 *perm-1* dsRNA at 20°C for 12-18 hours. The effectiveness of the deletion was  
563 screened phenotypically as follows: *par-2(RNAi)* and *par-3(RNAi)* -symmetric spindle  
564 positioning and cell division; *nmy-2(RNAi)* and *act-1(RNAi)* -absence of cortical  
565 ruffles, symmetric spindle positioning, no cytokinesis; *tba-2(RNAi)* -defective  
566 pronuclear meeting, no centration/rotation, no spindle assembly, misplaced  
567 cytokinesis furrow specification; *ocrl-1(RNAi)* -see results, *perm-1(RNAi)*: successful  
568 action of added drug.

### 569 **Live imaging**

570 Gravid hermaphrodites were dissected in osmotically balanced blastomere culture  
571 medium (Shelton and Bowerman, 1996) and the resulting embryos mounted on a 2%  
572 agarose pad. DIC time lapse microscopy (Fig. 1A,C,E,G,I) was performed at 25°C ±  
573 1°C with a 100× (NA 1.25 Achrostat) objective and standard DIC optics on a  
574 Zeiss Axioskop 2 microscope. All other images were acquired using an inverted  
575 Olympus IX 81 microscope equipped with a Yokogawa spinning disk CSU - W1 with  
576 a 63 (NA 1.42 U PLAN S APO) objective and a 16-bit PCO Edge sCMOS camera at  
577 23°C. Images were obtained using 488 nm and 561 nm solid-state lasers with an  
578 exposure time of 400 ms and a laser power of 20-60%. For cortical imaging, 3 planes  
579 at the cell cortex (each 0.25 μm apart) were acquired. Cell cycle stages were  
580 determined using transmission light microscopy by imaging the middle plane in  
581 parallel (data not shown).

### 582 **Image processing and analysis**

583 Cortical images of GFP::PH<sup>PLC151</sup> used for quantification were processed as follows:  
584 the 3 cortical planes were z-projected using average intensity projection, then a  
585 median filter of 1 pixel was applied. The background of the entire image was  
586 subtracted using the measured mean background in each frame. Signal intensity  
587 decay due to photobleaching was corrected with the Fiji plugin “bleach correction”  
588 using the exponential fitting method. The entire cortical region was segmented by  
589 applying a binary automated histogram-based threshold, followed by iterated  
590 morphological operations. Cortical structures were segmented by applying a binary  
591 intensity threshold, calculated by fitting the pixel intensity histogram with a Gaussian  
592 function and setting the threshold at 4 sigma from the Gaussian peak. The size of  
593 cortical structures was normalized to the total cortical area.

594 Curves of normalized cortical structures sizes were fit with a sigmoidal model and  
595 synchronized, setting the sigmoid inflection point, which corresponded typically to the  
596 time of centration/rotation, as time  $t=0$  s. Curves of normalized cortical structures  
597 sizes were aligned manually for *act-1(RNAi)* and *unc-26(s1710) ocr1-1(RNAi)*  
598 embryos using the clear landmark provided by Nuclear Envelope Breakdown (NEDB)  
599 as a reference, because a sigmoid function could not be fit with the PH markers in  
600 these cases. Since the time separating centration/rotation from NEDB is typically 150  
601 seconds,  $t=0$  was set at -150 seconds prior to NEDB for *act-1(RNAi)* and *unc-*  
602 *26(s1710) ocr1-1(RNAi)* embryos.

603 The Elongation Index was calculated as follows:  $((\text{perimeter}^2)/\text{area})/4\pi$  using the  
604 MATLAB image processing function “regionprops”. We then normalized the  
605 Elongation Index by a factor of  $1/\pi$  such that a square of 2 x 2 pixels has an  
606 Elongation Index of 1.

607 Cortical images obtained by live confocal spinning disk imaging and shown in the  
608 figures were processed as follows: the 3 cortical planes were z-projected using  
609 maximum intensity projection, then a median filter of 1 was applied. The grey value  
610 fluorescence intensity of some transgenes (GFP::PH<sup>PLC1 $\delta$ 1</sup> as heterozygote,  
611 GFP::PAR-2, GFP::PAR-6, Lifeact::mKate-2, mNeonGreen-PH<sup>PLC1 $\delta$ 1</sup>) was slightly  
612 variable likely resulting from variable expression/folding of the fluorescent fusion  
613 protein, which may stem for several reasons, including F1 heterozygosity,  
614 temperature shifting, silencing during crossing. The brightness and contrast of  
615 images resulting from embryos expressing these transgenes was therefore adjusted  
616 accordingly. The fluorescence intensity of mCherry::PH<sup>PLC1 $\delta$ 1</sup> was also variable in  
617 some cases; therefore, the brightness and contrast of images from embryos  
618 expressing mCherry::PH<sup>PLC1 $\delta$ 1</sup> were therefore adjusted accordingly as well. Such  
619 variability was especially pronounced in UNC-26 and OCRL-1 depleted embryos. To  
620 compare the intensity of mCherry-PH<sup>PLC1 $\delta$ 1</sup> in control embryos and *unc-26(s1710)*  
621 *ocr1-1(RNAi)* embryos, 3 cortical planes, acquired as described above, were z-  
622 projected by summing the intensity of all slices. The resulting mean intensities were  
623 then computed as follows. First, a Otsu threshold was used to retrieve the brightest  
624 elements - including the embryo - of the image, retaining only the biggest blob,  
625 corresponding to the embryo. Values outside the embryo were averaged to obtain  
626 the mean background intensity value, which was subtracted from the embryo pixels.

627 Thereafter, embryo pixel values were averaged to obtain the mean pixel intensity  
628 value.

### 629 **Cortical flow measurement, correlation analysis, and PIP<sub>2</sub> structures tracking**

630 For Particle Image Velocimetry (PIV) analysis, cortical image sequences of  
631 mNeonGreen:: $\text{PH}^{\text{PLC1}\delta 1}$  and Lifeact::mKate-2 were prepared by performing a  
632 maximum intensity z-projection of a stack of 2 planes (0.25  $\mu\text{m}$  apart) and applying a  
633 median filter of 1 pixel. PIP<sub>2</sub> cortical structures and the F-actin network were then  
634 segmented using the following procedure: the embryo was first extracted from the  
635 background using a histogram-based automated threshold, keeping only blobs of a  
636 size superior to one third of the biggest blob. The resulting binary images were  
637 deemed to be the embryo area. We applied a morphological erosion to the  
638 mNeonGreen:: $\text{PH}^{\text{PLC1}\delta 1}$  movies with a large structuring element (a disk 30 pixels in  
639 radius) to calculate the average value of the pixels not corresponding to PIP<sub>2</sub> cortical  
640 structures; the PIP<sub>2</sub> cortical structures were then segmented as the pixels of intensity  
641 higher than the computed average value, times a scaling factor determined  
642 empirically (1.7). The extraction of the F-actin network was achieved simply by  
643 determining a histogram-based automated threshold on the morphological top-hat of  
644 the F-actin image. F-actin filaments and PIP<sub>2</sub> cortical structures were segmented  
645 prior to PIV analysis to ensure that only flow fields in the region of interest are  
646 measured.

647 PIV was then performed to measure cortical flows using the MATLAB based PIVlab  
648 toolbox (Thielicke and Stamhuis, 2014); this splits each image of a movie into a  
649 regular grid, for which the size of grid cells is given by the user. The position of each  
650 cell in the next image is estimated by finding the maximum normalized cell-to-cell  
651 cross-correlation of equivalent sizes in a geometrical neighborhood called  
652 interrogation area. PIV was applied to mNeonGreen:: $\text{PH}^{\text{PLC1}\delta 1}$  and Lifeact::mKate-2  
653 separately, after segmentation of the corresponding cortical structures. The choice of  
654 the sizes of the cells and interrogation areas was a balance between two criteria:  
655 smaller cells allow to compute displacements with high spatial resolution, but  
656 excessively small cells do not contain enough information to be reliably correlated to  
657 other cells; the estimation of displacements of bigger cells is hence more reliable, but  
658 are computed with lesser resolution. We found empirically that 32 x 32 pixels for cell  
659 sizes, and 64 x 64 pixels for interrogation areas, to be a good compromise.

660 The PIV velocity fields output for both mNeonGreen::PH<sup>PLC1 $\delta$ 1</sup> and Lifeact::mKate-2  
661 signals were compared in terms of angles between colocalized features and  
662 correlation of the norms. For each movie, angles between velocity vectors of  
663 colocalized features were computed and plotted on a histogram. The average angle  
664 value for each time point and each movie was also computed, so as to monitor the  
665 coherence between the two vector fields over time. Similarly, we computed the  
666 correlations of the norms of all velocities in the two movies, for the whole movies, and  
667 also time-wise. The cut-off angle is defined as the  $\theta_0$  parameter of the curve of  
668 equation  $y = a \exp(-\theta/\theta_0)$  fitted to the histogram.

669 Cross-correlation analysis was performed as follows. Movies used to calculate the  
670 cross-correlation were acquired alternating acquisition of red or green channel first to  
671 prevent introducing a bias through the order of image acquisition. The colocalization  
672 of the thresholded PIP<sub>2</sub> cortical structures and F-actin network for a variety of time  
673 shifts was computed considering a time shift  $\Delta t$  (positive or negative), the  
674 colocalization of the segmented PIP<sub>2</sub> image at time  $t$  and the segmented F-actin  
675 image at time  $t-\Delta t$  using the following formula:

$$676 \text{ Colocalization} = (\text{PIP}_2(t) \cap \text{F-actin}(t-\Delta t)) / \text{PIP}_2(t)$$

677 Colocalization was computed in this manner from  $\Delta t = -(T-1)$  to  $\Delta t = (T-1)$ , where  $T$  is  
678 the total duration of the movie. The  $\Delta t$  for which colocalization is maximal represents  
679 the time shift between PIP<sub>2</sub> and F-actin. The mean time shift and its error were  
680 computed as follows: we fitted a parabola of equation  $y = a + (t-t_0)^2 + b$  to the  
681 location correlation as a function of the time shift. We calculated the best  $a$ ,  $b$  and  $t_0$   
682 parameters using a least-squares method, and input the standard deviations of the  
683 correlations to create a weight matrix used during the adjustment. The results were  
684 the mean time shift  $t_0 = 9.3\text{s}$  and the standard deviation  $\sigma_{t_0} = 1.5\text{s}$ .

685 To track PIP<sub>2</sub> structures, embryos expressing mNG-PH<sup>PLC1 $\delta$ 1</sup> were imaged with an  
686 exposure time of 50 ms, laser power of 60% and 70 ms frame rate. PIP<sub>2</sub> structures  
687 were tracked manually on maximum intensity z-projection of the images containing  
688 the moving PIP<sub>2</sub> structures of interest. The length of the track was obtained by  
689 reslicing it using the Fiji plugin "Reslice". Velocity was calculated from the  
690 corresponding number of time points and track length.

## 691 **Drug addition**

692 The eggshell was permeabilized by performing *perm-1(RNAi)* as described above.  
693 Gravid hermaphrodites were dissected in a cell culture dish with a glass bottom, and  
694 the resulting embryos imaged with an inverted confocal spinning disk microscope  
695 (see above). Drugs were added under the microscope while imaging to precisely  
696 control the timing of drug addition. The following drugs and concentrations were  
697 utilized: 30  $\mu$ M Ionomycin (Calbiochem, 407950), 3-5 mM  $\text{CaCl}_2$  (Sigma-Aldrich,  
698 C5080), 20  $\mu$ M Cytochalasin D (AppliChem, 22144-77-0), 12.5  $\mu$ M Latrunculin A  
699 (Sigma-Aldrich, 76343-93-6). For control movies, DMSO at a concentration  
700 equivalent to the final DMSO concentration in the drug solutions was added to the  
701 buffer prior to dissection.

702 Successful drug action was determined for each embryo by the disappearance of the  
703  $\text{PH}^{\text{PLC}1\delta 1}$  fluorescence signal from the plasma membrane (Ionomycin/  $\text{Ca}^{2+}$ ,  
704 Latrunculin A) and of Lifeact::mKate-2 from the cell cortex (Latrunculin A,  
705 Cytochalasin D). The time between drug addition and drug action was variable,  
706 probably due to variations in eggshell permeability upon *perm-1(RNAi)*. As a  
707 comparable reference time between embryos, we therefore determined the time  $t_{1/2}$  (t  
708 inflection) when half of fluorescence at the plasma membrane has disappeared.  $t_{1/2}$   
709 was determined as follows: the total cortical region of the embryo was segmented by  
710 applying a binary automated histogram-based threshold. Fluorescent values at a  
711 distance of 20 pixels from the edge were measured, and their mean fluorescence  
712 values plotted over time; the inflection point of a fitted sigmoid function was then  
713 determined as  $t_{1/2}$ .

## 714 **Lipid delivery**

715 BODIPY® FL Phosphatidylinositol 4,5-bisphosphate (Echelon Bioscience, C-45F6)  
716 (end concentration: 2  $\mu$ M) was delivered to *perm-1(RNAi)* embryos by adding it to the  
717 buffer in which gravid worms were dissected. It typically helped to premix BODIPY®  
718 FL Phosphatidylinositol 4,5-bisphosphate (100  $\mu$ M) with a carrier histone (P-9C2;  
719 Echelon Bioscience) (300  $\mu$ M) (Ozaki et al., 2000). Phosphoinositide-histone  
720 complexes were formed as described (Kotak et al., 2014): both components were  
721 mixed by vigorous vortexing and then incubated for at 15 min at room temperature.



722 **Statistical analyses**

723 The software package JMP 13.2.0 (SAS Institute GmbH) and MATLAB 2016 were  
724 used to perform statistical analysis. Two-group comparisons were performed using  
725 Student's t-test. Results with values of  $p \leq 0.05$  were considered statistically  
726 significant.



## 727 **Acknowledgments**

728 We thank Kalyani Thyagarajan and Sachin Kotak for initial observations of PIP<sub>2</sub>  
729 cortical structures, Olivier Burri (BioImaging and Optics Platform, BIOP, School of  
730 Life Sciences, EPFL) for help in developing the script for preprocessing of embryos  
731 with ImageJ, as well as the BIOP at large for microscopy support. For strains, we  
732 thank John Audyha, Daniel Dickinson, Bob Goldstein, Barth Grant, Stephan Grill,  
733 Anthony Hyman, Karen Oegema, and Anne-Cécile Reymann, as well as the  
734 *Caenorhabditis* Genetics Center (CGC), which is funded by NIH Office of Research  
735 Infrastructure Programs (P40 OD010440). This work was supported by the Swiss  
736 National Science Foundation (31003A\_155942). The funders had no role in study  
737 design, data collection and analysis, decision to publish, or preparation of the  
738 manuscript.

739 **References**

740

- 741 **Audhya, A., Hyndman, F., McLeod, I. X., Maddox, A. S., Yates, J. R., Desai, A.**  
742 **and Oegema, K.** (2005). A complex containing the Sm protein CAR-1 and the  
743 RNA helicase CGH-1 is required for embryonic cytokinesis in *Caenorhabditis*  
744 *elegans*. *J. Cell Biol.* **171**, 267–79.
- 745 **Beers, M. and Kemphues, K.** (2006). Depletion of the co-chaperone CDC-37  
746 reveals two modes of PAR-6 cortical association in *C. elegans* embryos.  
747 *Development* **133**, 3745–3754.
- 748 **Bienkowska, D. and Cowan, C. R.** (2012). Centrosomes Can Initiate a Polarity Axis  
749 from Any Position within One-Cell *C. elegans* Embryos. *Curr. Biol.* **22**, 583–589.
- 750 **Blanchoud, S., Budirahardja, Y., Naef, F. and Gönczy, P.** (2010). ASSET: A robust  
751 algorithm for the automated segmentation and standardization of early  
752 *Caenorhabditis elegans* embryos. *Dev. Dyn.* **239**, 3285–3296.
- 753 **Brangbour, C., du Roure, O., Helfer, E., Démoulin, D., Mazurier, A., Fermigier,**  
754 **M., Carlier, M.-F., Bibette, J. and Baudry, J.** (2011). Force-Velocity  
755 Measurements of a Few Growing Actin Filaments. *PLoS Biol.* **9**, e1000613.
- 756 **Brenner, S.** (1974). The genetics of *Caenorhabditis elegans*. *Genetics* **77**, 71–94.
- 757 **Brown, D. A.** (2015). PIP2Clustering: From model membranes to cells. *Chem. Phys.*  
758 *Lipids* **192**, 33–40.
- 759 **Cameron, L. A., Giardini, P. A., Soo, F. S. and Theriot, J. A.** (2000). Secrets of  
760 actin-based motility revealed by a bacterial pathogen. *Nat. Rev. Mol. Cell Biol.* **1**,  
761 110–119.
- 762 **Carlsson, A. E.** (2003). Growth velocities of branched actin networks. *Biophys. J.* **84**,  
763 2907–18.
- 764 **Carlsson, A. E.** (2010). Actin dynamics: from nanoscale to microscale. *Annu. Rev.*  
765 *Biophys.* **39**, 91–110.
- 766 **Carvalho, A., Olson, S. K., Gutierrez, E., Zhang, K., Noble, L. B., Zanin, E.,**  
767 **Desai, A., Groisman, A. and Oegema, K.** (2011). Acute Drug Treatment in the  
768 Early *C. elegans* Embryo. *PLoS One* **6**, e24656.

- 769 **Charest, D. L., Clark, D. V, Green, M. E. and Baillie, D. L.** (1990). Genetic and fine  
770 structure analysis of *unc-26(IV)* and adjacent regions in *Caenorhabditis elegans*.  
771 *Mol. Gen. Genet.* **221**, 459–65.
- 772 **Cheng, S., Wang, K., Zou, W., Miao, R., Huang, Y., Wang, H. and Wang, X.**  
773 (2015). PtdIns(4,5)P<sub>2</sub> and PtdIns3P coordinate to regulate phagosomal sealing  
774 for apoptotic cell clearance. *J. Cell Biol.* **210**, 485–502.
- 775 **Chichili, G. R. and Rodgers, W.** (2009). Cytoskeleton–membrane interactions in  
776 membrane raft structure. *Cell. Mol. Life Sci.* **66**, 2319–2328.
- 777 **Chierico, L., Joseph, A. S., Lewis, A. L. and Battaglia, G.** (2015). Live cell imaging  
778 of membrane / cytoskeleton interactions and membrane topology. *Sci. Rep.* **4**,  
779 6056.
- 780 **Claret, S., Jouette, J., Benoit, B., Legent, K. and Guichet, A.** (2014). PI(4,5)P<sub>2</sub>  
781 produced by the PI4P5K SKTL controls apical size by tethering PAR-3 in  
782 *Drosophila* epithelial cells. *Curr. Biol.* **24**, 1071–9.
- 783 **Cowan, C. R. and Hyman, A. A.** (2004). Centrosomes direct cell polarity  
784 independently of microtubule assembly in *C. elegans* embryos. *Nature* **431**, 92–  
785 96.
- 786 **Cuenca, A. A., Schetter, A., Aceto, D., Kempfues, K. and Seydoux, G.** (2003).  
787 Polarization of the *C. elegans* zygote proceeds via distinct establishment and  
788 maintenance phases. *Development* **130**, 1255–65.
- 789 **De Craene, J.-O., Bertazzi, D., Bär, S. and Friant, S.** (2017). Phosphoinositides,  
790 Major Actors in Membrane Trafficking and Lipid Signaling Pathways. *Int. J. Mol.*  
791 *Sci.* **18**, 634.
- 792 **Di Paolo, G. and De Camilli, P.** (2006). Phosphoinositides in cell regulation and  
793 membrane dynamics. *Nature* **443**, 651–657.
- 794 **Dickinson, D. J., Ward, J. D., Reiner, D. J. and Goldstein, B.** (2013). Engineering  
795 the *Caenorhabditis elegans* genome using Cas9-triggered homologous  
796 recombination. *Nat. Methods* **10**, 1028–34.
- 797 **Entchev, E. V and Kurzchalia, T. V** (2005). Requirement of sterols in the life cycle  
798 of the nematode *Caenorhabditis elegans*. *Semin. Cell Dev. Biol.* **16**, 175–82.

- 799 **Gallop, J. L., Walrant, A., Cantley, L. C. and Kirschner, M. W.** (2013).  
800 Phosphoinositides and membrane curvature switch the mode of actin  
801 polymerization via selective recruitment of toca-1 and Snx9. *Proc. Natl. Acad. Sci.* **110**, 7193–7198.
- 803 **Garcia, P., Gupta, R., Shah, S., Morris, A. J., Rudge, S. A., Scarlata, S., Petrova,**  
804 **V., McLaughlin, S. and Rebecchi, M. J.** (1995). The pleckstrin homology  
805 domain of phospholipase C- $\delta$ .1 binds with high affinity to  
806 phosphatidylinositol 4,5-bisphosphate in bilayer membranes. *Biochemistry* **34**,  
807 16228–16234.
- 808 **Gervais, L., Claret, S., Januschke, J., Roth, S. and Guichet, A.** (2008). PIP5K-  
809 dependent production of PIP2 sustains microtubule organization to establish  
810 polarized transport in the *Drosophila* oocyte. *Development* **135**, 3829–3838.
- 811 **Goehring, N. W., Hoegel, C., Grill, S. W. and Hyman, A. A.** (2011). PAR proteins  
812 diffuse freely across the anterior–posterior boundary in polarized *C. elegans*  
813 embryos. *J. Cell Biol.* **193**,.
- 814 **Goldstein, B. and Macara, I. G.** (2007). The PAR Proteins: Fundamental Players in  
815 Animal Cell Polarization. *Dev. Cell* **13**, 609–622.
- 816 **Golub, T. and Caroni, P.** (2005). PI(4,5)P2-dependent microdomain assemblies  
817 capture microtubules to promote and control leading edge motility. *J. Cell Biol.*  
818 **169**, 151–65.
- 819 **Golub, T. and Pico, C.** (2005). Spatial control of actin-based motility through  
820 plasmalemmal PtdIns (4, 5) P2-rich raft assemblies. *Biochem. Soc. Symp.*
- 821 **Gönczy, P.** (2008). Mechanisms of asymmetric cell division: flies and worms pave  
822 the way. *Nat. Rev. Mol. Cell Biol.* **9**, 355–366.
- 823 **Guglielmi, G., Barry, J. D., Huber, W. and De Renzis, S.** (2015). An Optogenetic  
824 Method to Modulate Cell Contractility during Tissue Morphogenesis. *Dev. Cell*  
825 **35**, 646–60.
- 826 **Guo, S. and Kemphues, K. J.** (1996). A non-muscle myosin required for embryonic  
827 polarity in *Caenorhabditis elegans*. *Nature* **382**, 455–458.
- 828 **Hammond, G. R. V., Fischer, M. J., Anderson, K. E., Holdich, J., Koteci, A.,**

- 829 **Balla, T. and Irvine, R. F.** (2012). PI4P and PI(4,5)P2 Are Essential But  
830 Independent Lipid Determinants of Membrane Identity. *Science* (80-. ). **337**,.
- 831 **Hao, Y., Boyd, L. and Seydoux, G.** (2006). Stabilization of cell polarity by the C.  
832 elegans RING protein PAR-2. *Dev. Cell* **10**, 199–208.
- 833 **Harris, T. W., Hartweg, E., Horvitz, H. R. and Jorgensen, E. M.** (2000). Mutations  
834 in synaptojanin disrupt synaptic vesicle recycling. *J. Cell Biol.* **150**, 589–600.
- 835 **Heppert, J. K., Dickinson, D. J., Pani, A. M., Higgins, C. D., Steward, A.,**  
836 **Ahringer, J., Kuhn, J. R. and Goldstein, B.** (2016). Comparative assessment  
837 of fluorescent proteins for in vivo imaging in an animal model system. *Mol. Biol.*  
838 *Cell* **27**, 3385–3394.
- 839 **Hill, D. P. and Strome, S.** (1988). An analysis of the role of microfilaments in the  
840 establishment and maintenance of asymmetry in *Caenorhabditis elegans*  
841 zygotes. *Dev. Biol.* **125**, 75–84.
- 842 **Hill, D. P. and Strome, S.** (1990). Brief cytochalasin-induced disruption of  
843 microfilaments during a critical interval in 1-cell *C. elegans* embryos alters the  
844 partitioning of developmental instructions to the 2-cell embryo. *Development*  
845 **108**, 159–72.
- 846 **Hoege, C. and Hyman, A. A.** (2013). Principles of PAR polarity in *Caenorhabditis*  
847 *elegans* embryos. *Nat. Rev. Mol. Cell Biol.* **14**, 315–322.
- 848 **Johnson, J. L., Erickson, J. W. and Cerione, R. A.** (2012). C-terminal Di-arginine  
849 Motif of Cdc42 Protein Is Essential for Binding to Phosphatidylinositol 4,5-  
850 Bisphosphate-containing Membranes and Inducing Cellular Transformation. *J.*  
851 *Biol. Chem.* **287**, 5764–5774.
- 852 **Kamath, R. S., Martinez-Campos, M., Zipperlen, P., Fraser, A. G. and Ahringer,**  
853 **J.** (2001). Effectiveness of specific RNA-mediated interference through ingested  
854 double-stranded RNA in *Caenorhabditis elegans*. *Genome Biol.* **2**,  
855 RESEARCH0002.
- 856 **Kamath, R. S., Fraser, A. G., Dong, Y., Poulin, G., Durbin, R., Gotta, M., Kanapin,**  
857 **A., Le Bot, N., Moreno, S., Sohrmann, M., et al.** (2003). Systematic functional  
858 analysis of the *Caenorhabditis elegans* genome using RNAi. *Nature* **421**, 231–  
859 237.

- 860 **Kirby, C., Kusch, M. and Kempfues, K.** (1990). Mutations in the par genes of  
861 *Caenorhabditis elegans* affect cytoplasmic reorganization during the first cell  
862 cycle. *Dev. Biol.* **142**, 203–15.
- 863 **Knoblich, J. A.** (2010). Asymmetric cell division: recent developments and their  
864 implications for tumour biology. *Nat. Rev. Mol. Cell Biol.* **11**, 849–860.
- 865 **Kotak, S., Busso, C. and Gonczy, P.** (2014). NuMA interacts with phosphoinositides  
866 and links the mitotic spindle with the plasma membrane. *EMBO J.* **33**, 1815–  
867 1830.
- 868 **Krahn, M. P., Klopfenstein, D. R., Fischer, N. and Wodarz, A.** (2010). Membrane  
869 Targeting of Bazooka/PAR-3 Is Mediated by Direct Binding to Phosphoinositide  
870 Lipids. *Curr. Biol.* **20**, 636–642.
- 871 **Kumfer, K. T., Cook, S. J., Squirrell, J. M., Eliceiri, K. W., Peel, N., O’Connell, K.**  
872 **F. and White, J. G.** (2010). CGEF-1 and CHIN-1 Regulate CDC-42 Activity  
873 during Asymmetric Division in the *Caenorhabditis elegans* Embryo. *Mol. Biol.*  
874 *Cell* **21**, 266–277.
- 875 **Kurzchalia, T. V and Ward, S.** (2003). Why do worms need cholesterol? *Nat. Cell*  
876 *Biol.* **5**, 684–8.
- 877 **Kurzchalia, T. V., Scheel, J., Srinivasan, J., Honnert, U. and Henske, A.** (1999).  
878 Involvement of caveolin-1 in meiotic cell-cycle progression in *Caenorhabditis*  
879 *elegans*. *Nat. Cell Biol.* **1**, 127–129.
- 880 **Lemmon, M. A., Ferguson, K. M., O’Brien, R., Sigler, P. B. and Schlessinger, J.**  
881 (1995). Specific and high-affinity binding of inositol phosphates to an isolated  
882 pleckstrin homology domain. *Proc. Natl. Acad. Sci. U. S. A.* **92**, 10472–6.
- 883 **Liu, A. P. and Fletcher, D. A.** (2006). Actin polymerization serves as a membrane  
884 domain switch in model lipid bilayers. *Biophys. J.* **91**, 4064–70.
- 885 **McLaughlin, S., Wang, J., Gambhir, A. and Murray, D.** (2002). PIP<sub>2</sub> and Proteins:  
886 Interactions, Organization, and Information Flow. *Annu. Rev. Biophys. Biomol.*  
887 *Struct.* **31**, 151–175.
- 888 **Merris, M., Wadsworth, W. G., Khamrai, U., Bittman, R., Chitwood, D. J. and**  
889 **Lenard, J.** (2003). Sterol effects and sites of sterol accumulation in

- 890 Caenorhabditis elegans: developmental requirement for 4 $\alpha$ -methyl sterols. *J.*  
891 *Lipid Res.* **44**, 172–81.
- 892 **Mogilner, A. and Oster, G.** (1996). Cell Motility Driven by Actin Polymerization.  
893 *Biophys. J.* **71**, 3030–3045.
- 894 **Motegi, F. and Sugimoto, A.** (2006). Sequential functioning of the ECT-2 RhoGEF,  
895 RHO-1 and CDC-42 establishes cell polarity in Caenorhabditis elegans embryos.  
896 *Nat. Cell Biol.* **8**, 978–985.
- 897 **Motegi, F., Velarde, N. V., Piano, F., Sugimoto, A., Malone, C. J., White, J.,**  
898 **Seydoux, G., Saxton, W. and Salmon, E. D.** (2006). Two Phases of Astral  
899 Microtubule Activity during Cytokinesis in *C. elegans* Embryos. *Dev. Cell* **10**,  
900 509–520.
- 901 **Motegi, F., Zonies, S., Hao, Y., Cuenca, A. A., Griffin, E. and Seydoux, G.** (2011).  
902 Microtubules induce self-organization of polarized PAR domains in  
903 Caenorhabditis elegans zygotes. *Nat. Cell Biol.* **13**, 1361–1367.
- 904 **Munro, E., Nance, J. and Priess, J. R.** (2004). Cortical Flows Powered by  
905 Asymmetrical Contraction Transport PAR Proteins to Establish and Maintain  
906 Anterior-Posterior Polarity in the Early *C. elegans* Embryo. *Dev. Cell* **7**, 413–424.
- 907 **Ozaki, S., DeWald, D. B., Shope, J. C., Chen, J. and Prestwich, G. D.** (2000).  
908 Intracellular delivery of phosphoinositides and inositol phosphates using  
909 polyamine carriers. *Proc. Natl. Acad. Sci. U. S. A.* **97**, 11286–91.
- 910 **Pacquelet, A.** (2017). Asymmetric Cell Division in the One-Cell *C. elegans* Embryo:  
911 Multiple Steps to Generate Cell Size Asymmetry. pp. 115–140. Springer, Cham.
- 912 **Panbianco, C., Weinkove, D., Zanin, E., Jones, D., Divecha, N., Gotta, M. and**  
913 **Ahringer, J.** (2008). A casein kinase 1 and PAR proteins regulate asymmetry of  
914 a PIP(2) synthesis enzyme for asymmetric spindle positioning. *Dev. Cell* **15**,  
915 198–208.
- 916 **Redemann, S., Pecreaux, J., Goehring, N. W., Khairy, K., Stelzer, E. H. K.,**  
917 **Hyman, A. A. and Howard, J.** (2010). Membrane Invaginations Reveal Cortical  
918 Sites that Pull on Mitotic Spindles in One-Cell *C. elegans* Embryos. *PLoS One* **5**,  
919 e12301.



- 920 **Reymann, A.-C., Staniscia, F., Erzberger, A., Salbreux, G. and Grill, S. W.** (2016).  
921 Cortical flow aligns actin filaments to form a furrow. *Elife* **5**.
- 922 **Riddle, D. L.** (1988). The dauer larva. In *The Nematode Caenorhabditis elegans* (ed.  
923 W. B. WOODRUFF. Cold Spring Harbor Laboratory, Cold Spring Harbor, N. Y.), pp.  
924 393–412.
- 925 **Robin, F. B., McFadden, W. M., Yao, B. and Munro, E. M.** (2014). Single-molecule  
926 analysis of cell surface dynamics in *Caenorhabditis elegans* embryos. *Nat.*  
927 *Methods* **11**, 677–682.
- 928 **Rodriguez, J., Peglion, F., Martin, J., Hubatsch, L., Reich, J., Hirani, N.,**  
929 **Gubieda, A. G., Roffey, J., Fernandes, A. R., St Johnston, D., et al.** (2017).  
930 aPKC Cycles between Functionally Distinct PAR Protein Assemblies to Drive  
931 Cell Polarity. *Dev. Cell*.
- 932 **Rose, L. and Gönczy, P.** (2014). Polarity establishment, asymmetric division and  
933 segregation of fate determinants in early *C. elegans* embryos. *WormBook* 1–43.
- 934 **Rual, J.-F., Ceron, J., Koreth, J., Hao, T., Nicot, A.-S., Hirozane-Kishikawa, T.,**  
935 **Vandenhoute, J., Orkin, S. H., Hill, D. E., van den Heuvel, S., et al.** (2004).  
936 Toward improving *Caenorhabditis elegans* phenome mapping with an  
937 ORFeome-based RNAi library. *Genome Res.* **14**, 2162–8.
- 938 **Sato, K., Sato, M., Audhya, A., Oegema, K., Schweinsberg, P. and Grant, B. D.**  
939 (2006). Dynamic regulation of caveolin-1 trafficking in the germ line and embryo  
940 of *Caenorhabditis elegans*. *Mol. Biol. Cell* **17**, 3085–94.
- 941 **Schenk, C., Bringmann, H., Hyman, A. A. and Cowan, C. R.** (2010). Cortical  
942 domain correction repositions the polarity boundary to match the cytokinesis  
943 furrow in *C. elegans* embryos. *Development* **137**, 1743–53.
- 944 **Schonegg, S. and Hyman, A. A.** (2006). CDC-42 and RHO-1 coordinate acto-  
945 myosin contractility and PAR protein localization during polarity establishment in  
946 *C. elegans* embryos. *Development* **133**, 3507–16.
- 947 **Schonegg, S., Constantinescu, A. T., Hoege, C. and Hyman, A. A.** (2007). The  
948 Rho GTPase-activating proteins RGA-3 and RGA-4 are required to set the initial  
949 size of PAR domains in *Caenorhabditis elegans* one-cell embryos. *Proc. Natl.*  
950 *Acad. Sci. U. S. A.* **104**, 14976–81.

- 951 **Severson, A. F. and Bowerman, B.** (2003). Myosin and the PAR proteins polarize  
952 microfilament-dependent forces that shape and position mitotic spindles in  
953 *Caenorhabditis elegans*. *J. Cell Biol.* **161**,.
- 954 **Shelton, C. A. and Bowerman, B.** (1996). Time-dependent responses to glp-1-  
955 mediated inductions in early *C. elegans* embryos. *Development* **122**, 2043–50.
- 956 **Shelton, C. A., Carter, J. C., Ellis, G. C. and Bowerman, B.** (1999). The  
957 Nonmuscle Myosin Regulatory Light Chain Gene *mlc-4* Is Required for  
958 Cytokinesis, Anterior-Posterior Polarity, and Body Morphology during  
959 *Caenorhabditis elegans* Embryogenesis. *J. Cell Biol.* **146**,.
- 960 **Thielicke, W. and Stamhuis, E. J.** (2014). PIVlab – Towards User-friendly,  
961 Affordable and Accurate Digital Particle Image Velocimetry in MATLAB. *J. Open*  
962 *Res. Softw.* **2**,.
- 963 **Tse, Y. C., Werner, M., Longhini, K. M., Labbe, J.-C., Goldstein, B. and Glotzer,**  
964 **M.** (2012). RhoA activation during polarization and cytokinesis of the early  
965 *Caenorhabditis elegans* embryo is differentially dependent on NOP-1 and CYK-  
966 4. *Mol. Biol. Cell* **23**, 4020–31.
- 967 **Várnai, P. and Balla, T.** (1998). Visualization of Phosphoinositides That Bind  
968 Pleckstrin Homology Domains: Calcium- and Agonist-induced Dynamic Changes  
969 and Relationship to Myo-[<sup>3</sup>H]inositol-labeled Phosphoinositide Pools. *J. Cell*  
970 *Biol.* **143**,.
- 971 **Wang, S.-C., Low, T. Y. F., Nishimura, Y., Gole, L., Yu, W. and Motegi, F.** (2017).  
972 Cortical forces and CDC-42 control clustering of PAR proteins for  
973 *Caenorhabditis elegans* embryonic polarization. *Nat. Cell Biol.* **19**, 988–995.
- 974 **Weinkove, D., Bastiani, M., Chessa, T. A. M., Joshi, D., Hauth, L., Cooke, F. T.,**  
975 **Divecha, N. and Schuske, K.** (2008). Overexpression of PPK-1, the  
976 *Caenorhabditis elegans* Type I PIP kinase, inhibits growth cone collapse in the  
977 developing nervous system and causes axonal degeneration in adults. *Dev. Biol.*  
978 **313**, 384–397.
- 979 **Wilson, C. A., Tsuchida, M. A., Allen, G. M., Barnhart, E. L., Applegate, K. T.,**  
980 **Yam, P. T., Ji, L., Keren, K., Danuser, G. and Theriot, J. A.** (2010). Myosin II  
981 contributes to cell-scale actin network treadmill through network disassembly.

- 982 *Nature* **465**, 373–7.
- 983 **Wu, C.-Y., Lin, M.-W., Wu, D.-C., Huang, Y.-B., Huang, H.-T. and Chen, C.-L.**  
984 (2014). The role of phosphoinositide-regulated actin reorganization in  
985 chemotaxis and cell migration. *Br. J. Pharmacol.* **171**, 5541–54.
- 986 **Xu, X., Guo, H., Wycuff, D. L. and Lee, M.** (2007). Role of phosphatidylinositol-4-  
987 phosphate 5' kinase (ppk-1) in ovulation of *Caenorhabditis elegans*. *Exp. Cell*  
988 *Res.* **313**, 2465–75.
- 989 **Yin, H. L. and Janmey, P. A.** (2003). Phosphoinositide Regulation of the Actin  
990 Cytoskeleton. *Annu. Rev. Physiol.* **65**, 761–789.
- 991 **Zhang, L., Mao, Y. S., Janmey, P. A. and Yin, H. L.** (2012). Phosphatidylinositol 4,  
992 5 Bisphosphate and the Actin Cytoskeleton. pp. 177–215. Springer, Dordrecht.
- 993
- 994

995 **Figure legends**

996 **Fig. 1. The PIP<sub>2</sub> biomarker GFP::PH<sup>PLC1δ1</sup> is enriched in dynamic cortical**  
997 **structures**

998 **(A-J)** Differential interference contrast (DIC) (A, C, E, G, I, middle plane of the  
999 embryo) and spinning disk confocal imaging (B, D, F, H, J, cortical plane of a  
1000 different embryo at the corresponding stages, with boxed regions magnified below) of  
1001 one-cell *C. elegans* embryos at the indicated stages expressing GFP::PH<sup>PLC1δ1</sup>  
1002 monitoring PIP<sub>2</sub>. Unless indicated otherwise, scale bar in this and subsequent  
1003 figures: 10 μm. Time is indicated in minutes:seconds, with 00:00 corresponding to the  
1004 time of centration/rotation ( $t_0$  in K-M). See also Movie 1. Here and in all subsequent  
1005 figures, the embryo anterior is to the left.

1006 **(K)** Fraction of cell cortex covered by PIP<sub>2</sub> structures. The timing of pseudocleavage  
1007 and mitosis are indicated. Here and in similar subsequent panels: anterior (orange)  
1008 and posterior (green) quantitative data is shown, with the mean and the standard  
1009 deviation. N=39 embryos for K-M.

1010 **(L)** Average cortical area covered by PIP<sub>2</sub> structures over time.

1011 **(M)** Elongation Index of PIP<sub>2</sub> cortical structures over time. Larger values correspond  
1012 to most elongated shapes.

1013

1014

1015 **Fig. 2. PIP<sub>2</sub> cortical structures depend on A-P polarity**

1016 **(A, B)** Dual color spinning disk confocal cortical imaging of *C. elegans* embryos at  
1017 the pseudocleavage stage harboring the indicated pairs of fusion proteins; the  
1018 column on the right shows high magnification views of the boxed regions. (A)  
1019 mCherry::PH<sup>PLC1δ1</sup> and GFP::PAR-2, N=5. (B) mCherry::PH<sup>PLC1δ1</sup> and GFP::PAR-6,  
1020 N=5; note that elongated cortical structures (arrowhead) but not foci (arrow) of  
1021 GFP::PAR-6 overlap with mCherry::PH<sup>PLC1δ1</sup> cortical structures. See also Movie 2.

1022 **(C, E, G)** Cortical plane images at pseudocleavage from movies acquired by spinning  
1023 disk confocal imaging of control (C), *par-3(RNAi)* (E, N=10) or *par-2(RNAi)* (G, N=11)  
1024 *C. elegans* embryos expressing GFP::PH<sup>PLC1δ1</sup>.

1025 **(D, F, H)** Fraction of cell cortex covered by PIP<sub>2</sub> structures on the anterior (orange)  
1026 and posterior (green) side in the conditions corresponding to (C, E, G).

1027

1028 **Fig. 3. PIP<sub>2</sub> cortical structures overlap with ECT-2, CDC-42, RHO-1, and partially**  
1029 **with actin**

1030 **(A-E)** Dual color spinning disk confocal cortical imaging of *C. elegans* embryos at the  
1031 pseudocleavage stage harboring the indicated pairs of fusion proteins; the column on  
1032 the right shows high magnification views of the boxed regions. (A)  
1033 mNeonGreen::PH<sup>PLC1 $\delta$ 1</sup> and Lifeact::mKate-2, N=46; See also Movie 3. (B)  
1034 mCherry::PH<sup>PLC1 $\delta$ 1</sup> and GFP::NMY-2, N=9; See also Movie 4. (C) mCherry::PH<sup>PLC1 $\delta$ 1</sup>  
1035 and GFP::RHO-1, N=9; (D) mCherry::PH<sup>PLC1 $\delta$ 1</sup> and GFP::CDC-42, N=7; See also  
1036 Movie 5. (E) mKate2-PH<sup>PLC1 $\delta$ 1</sup> and GFP::ECT-2, N=13.

1037

1038 **Fig. 4. Coupling between PIP<sub>2</sub> cortical structures and F-actin**

1039 **(A)** First column: representative fluorescent images of spinning disk confocal cortical  
1040 imaging of embryos expressing mNG::PH<sup>PLC1 $\delta$ 1</sup> and Lifeact::mKate-2 used to perform  
1041 the PIV analysis. Second column: binary images of thresholded fluorescent images.  
1042 Third column: PIV velocity vectors (high magnification views of the boxed regions on  
1043 the right), arrow direction and length represent flow direction and velocity,  
1044 respectively.

1045 **(B)** mNG::PH<sup>PLC1 $\delta$ 1</sup> flow velocity plotted as a function of Lifeact::mKate-2 velocity in  
1046 the same position and at the same time. Data points are represented with a color  
1047 scale dependent on their spatial density, from denser to sparser (red, yellow, light  
1048 blue). Pearson correlation coefficient:  $\rho=0.61$ ,  $p=0$  with Matlab precision, Student's t  
1049 test. N=13 embryos for B-D.

1050 **(C)** Angle distribution between flow velocity vectors of mNG::PH<sup>PLC1 $\delta$ 1</sup> and  
1051 Lifeact::mKate-2 in the same position and at the same time. The angle distribution  
1052 peaks at  $\theta = 0^\circ$  and decays exponentially thereafter (cutoff angle:  $\theta=38^\circ$ ). Two  
1053 independent velocity fields cannot result in the observed angle distribution  
1054 (probability:  $p=0$  with Matlab precision (shi2-test)).

1055 **(D)** Cross-correlation between thresholded binary movies of mNG::PH<sup>PLC1 $\delta$ 1</sup> and  
1056 Lifeact::mKate-2; Lifeact::mKate-2 was shifted with different time intervals relative to  
1057 mNG::PH<sup>PLC1 $\delta$ 1</sup>. The boxed region is magnified on the right, showing that average  
1058 maximal overlap is achieved with a time shift of  $\Delta t = -9.3 \pm 1.5$  seconds (average  
1059 and standard deviation), irrespective of the order in which the two signals were  
1060 recorded (Materials and Methods). See also Movie 6.

1061 **(E)** Embryo expressing mNG::PH<sup>PLC1 $\delta$ 1</sup> and Lifeact::mKate-2 imaged every 4.2  
1062 seconds; the boxed region is magnified on the right and shows snapshots from  
1063 corresponding movie illustrating that mNeonGreen::PH<sup>PLC1 $\delta$ 1</sup> (white arrow) moves  
1064 ahead of Lifeact::mKate-2.  
1065 **(F, H, J)** Cortical plane images at pseudocleavage from spinning disk confocal  
1066 imaging of *C. elegans* embryos treated as indicated and expressing GFP::PH<sup>PLC1 $\delta$ 1</sup>.  
1067 (F) *nmy-2(RNAi)*, N=7; (H) *act-1(RNAi)*, N=8 at pseudocleavage and N=12 at mitosis;  
1068 (J) *tba-2(RNAi)*, N=10. Note that both *act-1(RNAi)* and *tba-2(RNAi)* correspond to  
1069 severe but partial depletion conditions, as more complete depletion results in sterility.  
1070 Arrowhead: remaining PIP<sub>2</sub> structure.

1071 **(G, I, K)** Fraction of cell cortex covered by PIP<sub>2</sub> structures on the anterior (orange)  
1072 and posterior (green) of *nmy-2(RNAi)* (G, N=7), *act-1(RNAi)* (I, N= 8 at  
1073 pseudocleavage, N=12 at mitosis) or *tba-2(RNAi)* (K, N=10) embryos.

1074  
1075 **Fig. 5. Proper PIP<sub>2</sub> cellular level is essential for correct organization of the actin**  
1076 **cytoskeleton**

1077 **(A-I)** Confocal spinning disk imaging of embryos expressing GFP::PH<sup>PLC1 $\delta$ 1</sup> and  
1078 Lifeact::mKate-2 (A-C: middle plane, D-I: cortical plane).

1079 **(A)** DMSO treated *perm-1(RNAi)* control embryos.

1080 **(B, C)** *perm-1(RNAi)* embryos treated with Ionomycin/Ca<sup>2+</sup>.  $t_{1/2}$ =00:00: time at which  
1081 half of plasma membrane GFP::PH<sup>PLC1 $\delta$ 1</sup> fluorescence disappeared; the time stamps  
1082 are shown in yellow here and in following figure panels where  $t_{1/2}$ =00:00. N=17, all  
1083 stages combined. (B)  $t_{1/2}$  at pseudocleavage. Note that the absence of coverslip,  
1084 which is needed to preserve fragile *perm-1(RNAi)* embryos, prevents their flattening,  
1085 such that they are more contractile. Note also that the pseudocleavage furrow moves  
1086 towards the anterior and either remains there until the end of the first cell cycle (N=4,  
1087 as shown) or relaxes (N=4, not shown) (C)  $t_{1/2}$  at mitosis. Note that whereas embryos  
1088 were dissected in the drug-containing solution, drug action (as monitored by  $t_{1/2}$ ) took  
1089 place > 6 min after polarity was established. See also Movie 7.

1090 **(D-I)** Control (D, G) and *ocr1-1(RNAi) unc-26(s1710)* (E, F, H, I) embryo during  
1091 pseudocleavage (D, E, F) or mitosis (G, H, I). (E, H) class 1 phenotype (GFP::PH  
1092 <sup>PLC1 $\delta$ 1</sup>: N=27/48, Lifeact::mKate-2: N=4/11); arrow: immotile structure, arrowhead:  
1093 motile structure. (F, I) class 2 phenotype (GFP::PH<sup>PLC1 $\delta$ 1</sup>: N=21/48, Lifeact::mKate-2:

1094 N=7/11). White dashed line in (G-I) show the position utilized to create the  
1095 corresponding kymographs in (J-L). See also Movie 9.  
1096 **(J-L)** Kymographs corresponding to the above movies aligned at cytokinesis arrow:  
1097 immotile structure, arrowhead: motile structure; Note that motile cortical PIP<sub>2</sub>  
1098 structures eventually move towards the cleavage furrow, which partly corrects the  
1099 aberrant PIP<sub>2</sub> cortical domain distribution, consistent with the presence of a  
1100 mechanism correcting mispositioned cortical domains operating at this stage (Schenk  
1101 et al., 2010). Entire durations of the kymographs, in min:sec: (J) 16:30, (K) 20:00, (L)  
1102 19:00.

1103  
1104

1105 **Fig. 6. Proper PIP<sub>2</sub> cellular level is essential for correct PAR polarity**

1106 **(A-C, G-I)** Confocal spinning disk cortical imaging of control (A, G) or *ocr1-1(RNAi)*  
1107 *unc-26(s1710)* (B, C, H, I) embryos expressing mCherry::PH<sup>PLC1δ1</sup> and GFP::PAR-6  
1108 (A-C, N=5/9 class I, N=4/9 class II) or GFP::PAR-2 (G-I, N=12/22 class I; N=10/22  
1109 class II). White dashed lines indicate positions used to create the corresponding  
1110 kymographs in. See also Movies 10, 11.

1111 **(D-F, J-L)** Kymographs corresponding to the above movies aligned at cytokinesis.  
1112 Entire durations of the kymographs, in min:sec: (D) 16:40, (E) 11:20, (F) 17:40, (G)  
1113 17:40, (H) 17:40, (I) 17:40.

1114 **(M-O)** Images acquired by confocal imaging of embryos expressing GFP::PAR-2, 4.5  
1115 μm below the cortical plane. The dashed line marks the boundary of the PAR-2  
1116 domain. (M): DMSO treated control *perm-1(RNAi)* embryo. (N, O): *perm-1(RNAi)*  
1117 embryo treated with Ionomycin/Ca<sup>2+</sup> ( $t_{1/2}$ =00:00) during pseudocleavage, N=6; during  
1118 mitosis, N=3). Note: worms were dissected in the drug, but drug action ( $t_{1/2}$ ) took place  
1119 > 6 min after polarity was established. See Movies 12, 13, 14.

1120

1121 **Fig. 7. F-actin impairment affects GFP::PAR-2 also during polarity maintenance**

1122 **(A-C)** Confocal spinning disk cortical imaging of *perm-1(RNAi)* embryos expressing  
1123 GFP::PAR-2 and Lifeact::mKate-2 (middle plane), treated during early  
1124 centration/rotation either with DMSO (A, N=6), Cytochalasin D (B, N=5, note that this  
1125 movie was acquired with binning=2), or Latrunculin A (C, N=18). Arrowhead points to  
1126 plasma membrane invagination (Redemann et al., 2010). See Movies 15, 16.



1127 **(D)** Graphical summary and working model (not to scale). PIP<sub>2</sub> is enriched in dynamic  
1128 and polarized structures at the cortex of one-cell *C. elegans* embryos. These  
1129 structures move ahead of F-actin fibers, with which their velocity and direction is  
1130 correlated. Moreover, the two components exhibit mutually reciprocal requirements,  
1131 as the formation of PIP<sub>2</sub> cortical structures requires F-actin, whereas a proper PIP<sub>2</sub>  
1132 level is essential for F-actin network organization. Moreover, through its ability to  
1133 properly reorganize the F-actin network, PIP<sub>2</sub> is essential for proper sizing of PAR  
1134 domains and thus for A-P polarity establishment and maintenance. In addition, there  
1135 might be an actin independent pathway through which PIP<sub>2</sub> regulates polarity. See  
1136 text for further details. Note that in the cortical embryo schematic on the top right, for  
1137 simplicity only those F-actin filaments that move in concert with PIP<sub>2</sub> cortical  
1138 structures are represented.  
1139

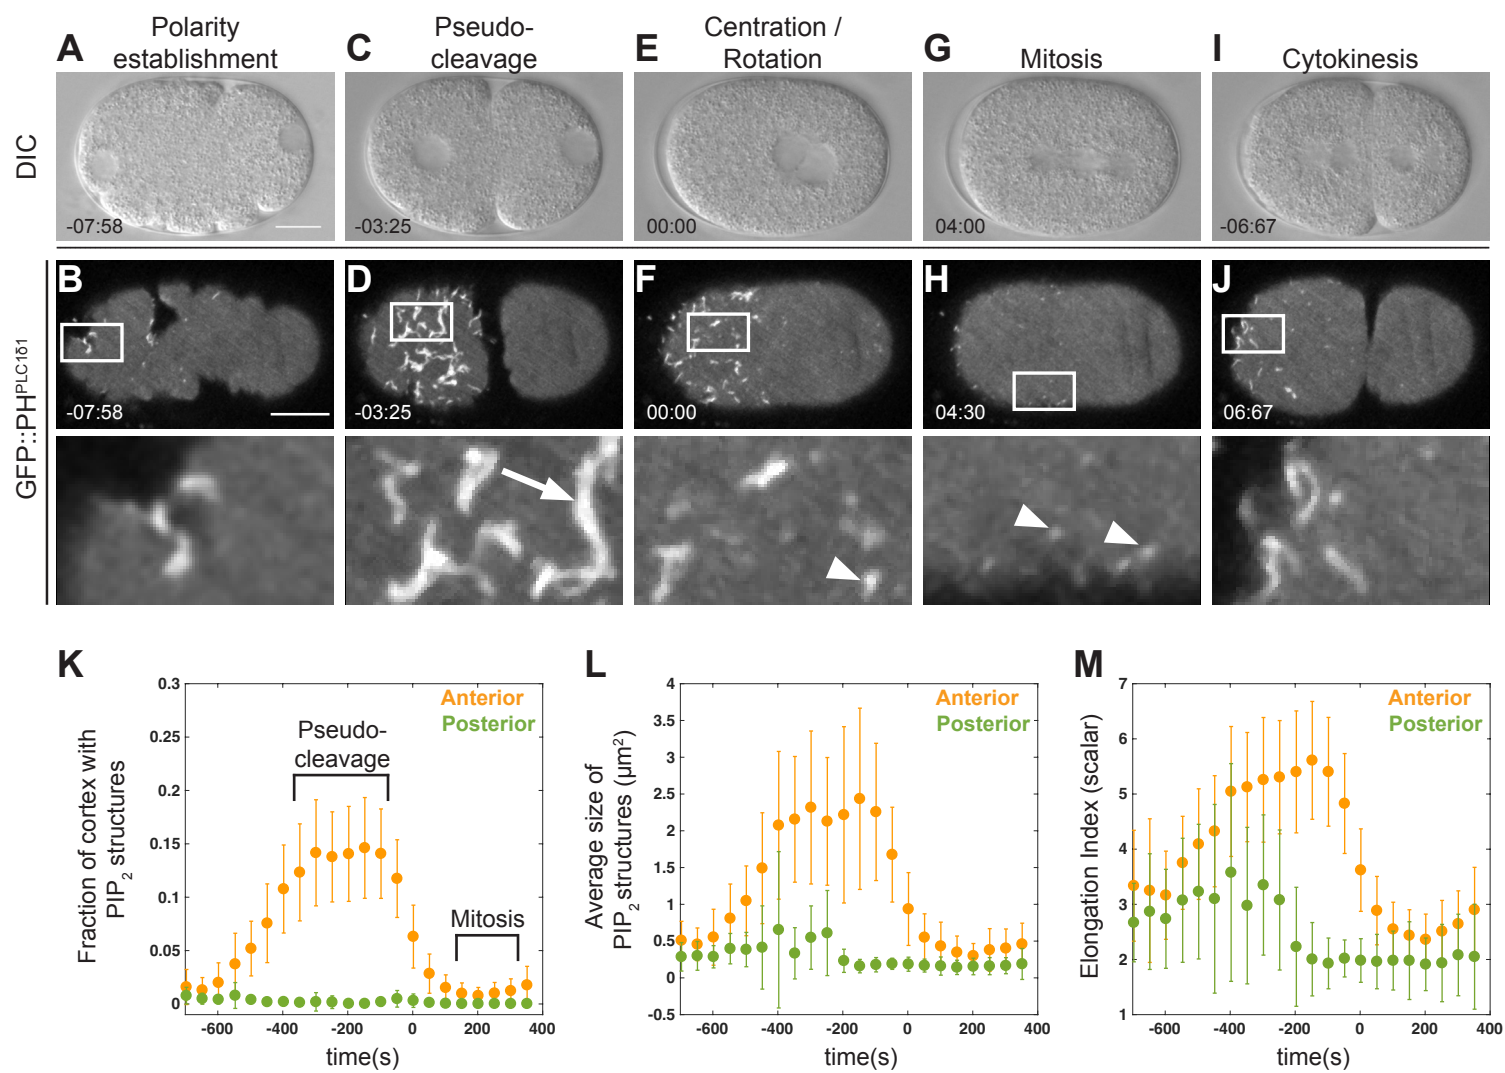

Figure 1

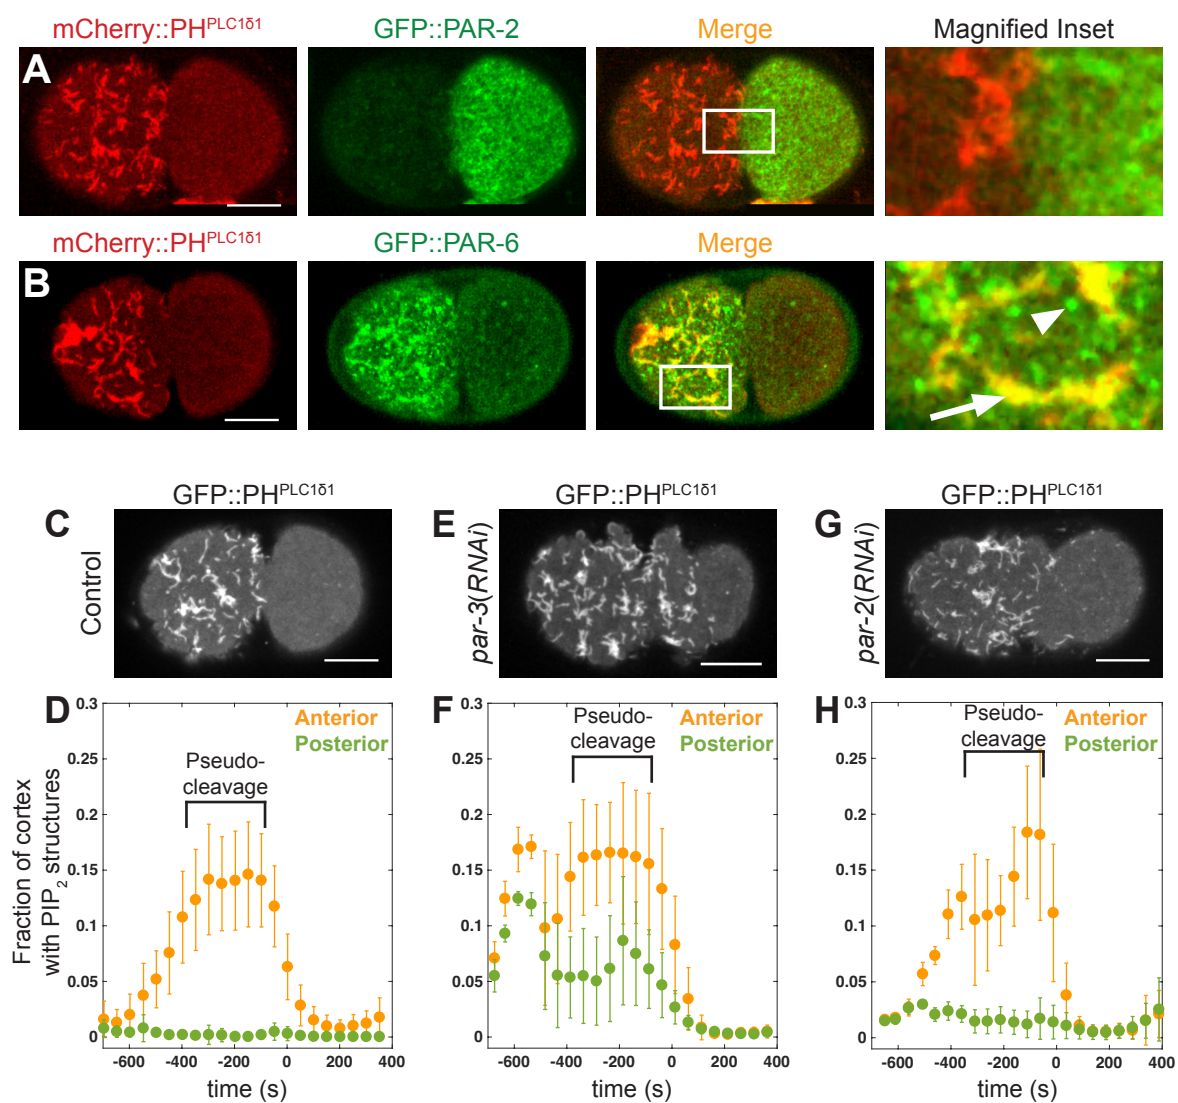

Figure 2

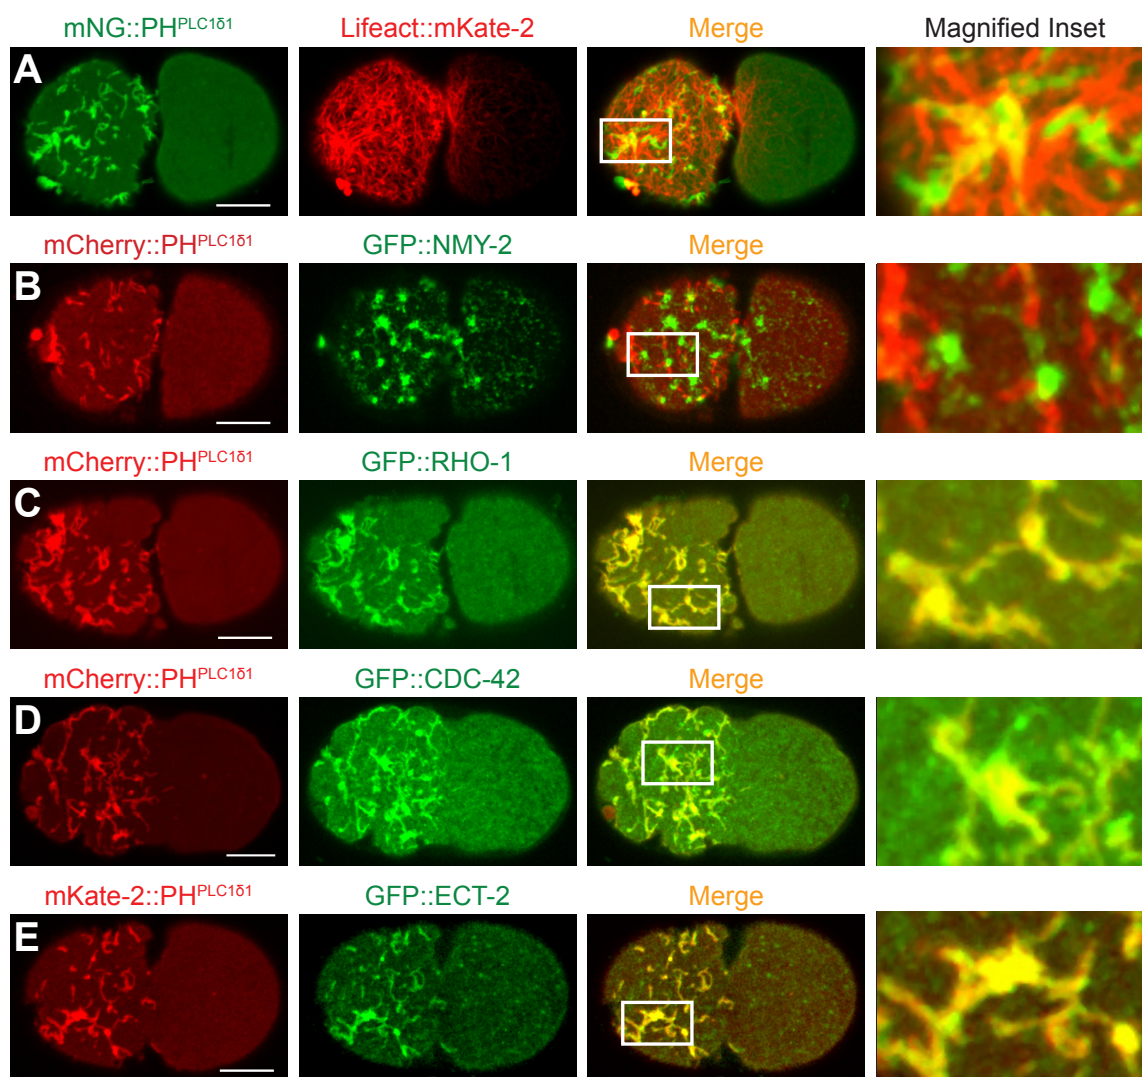

Figure 3

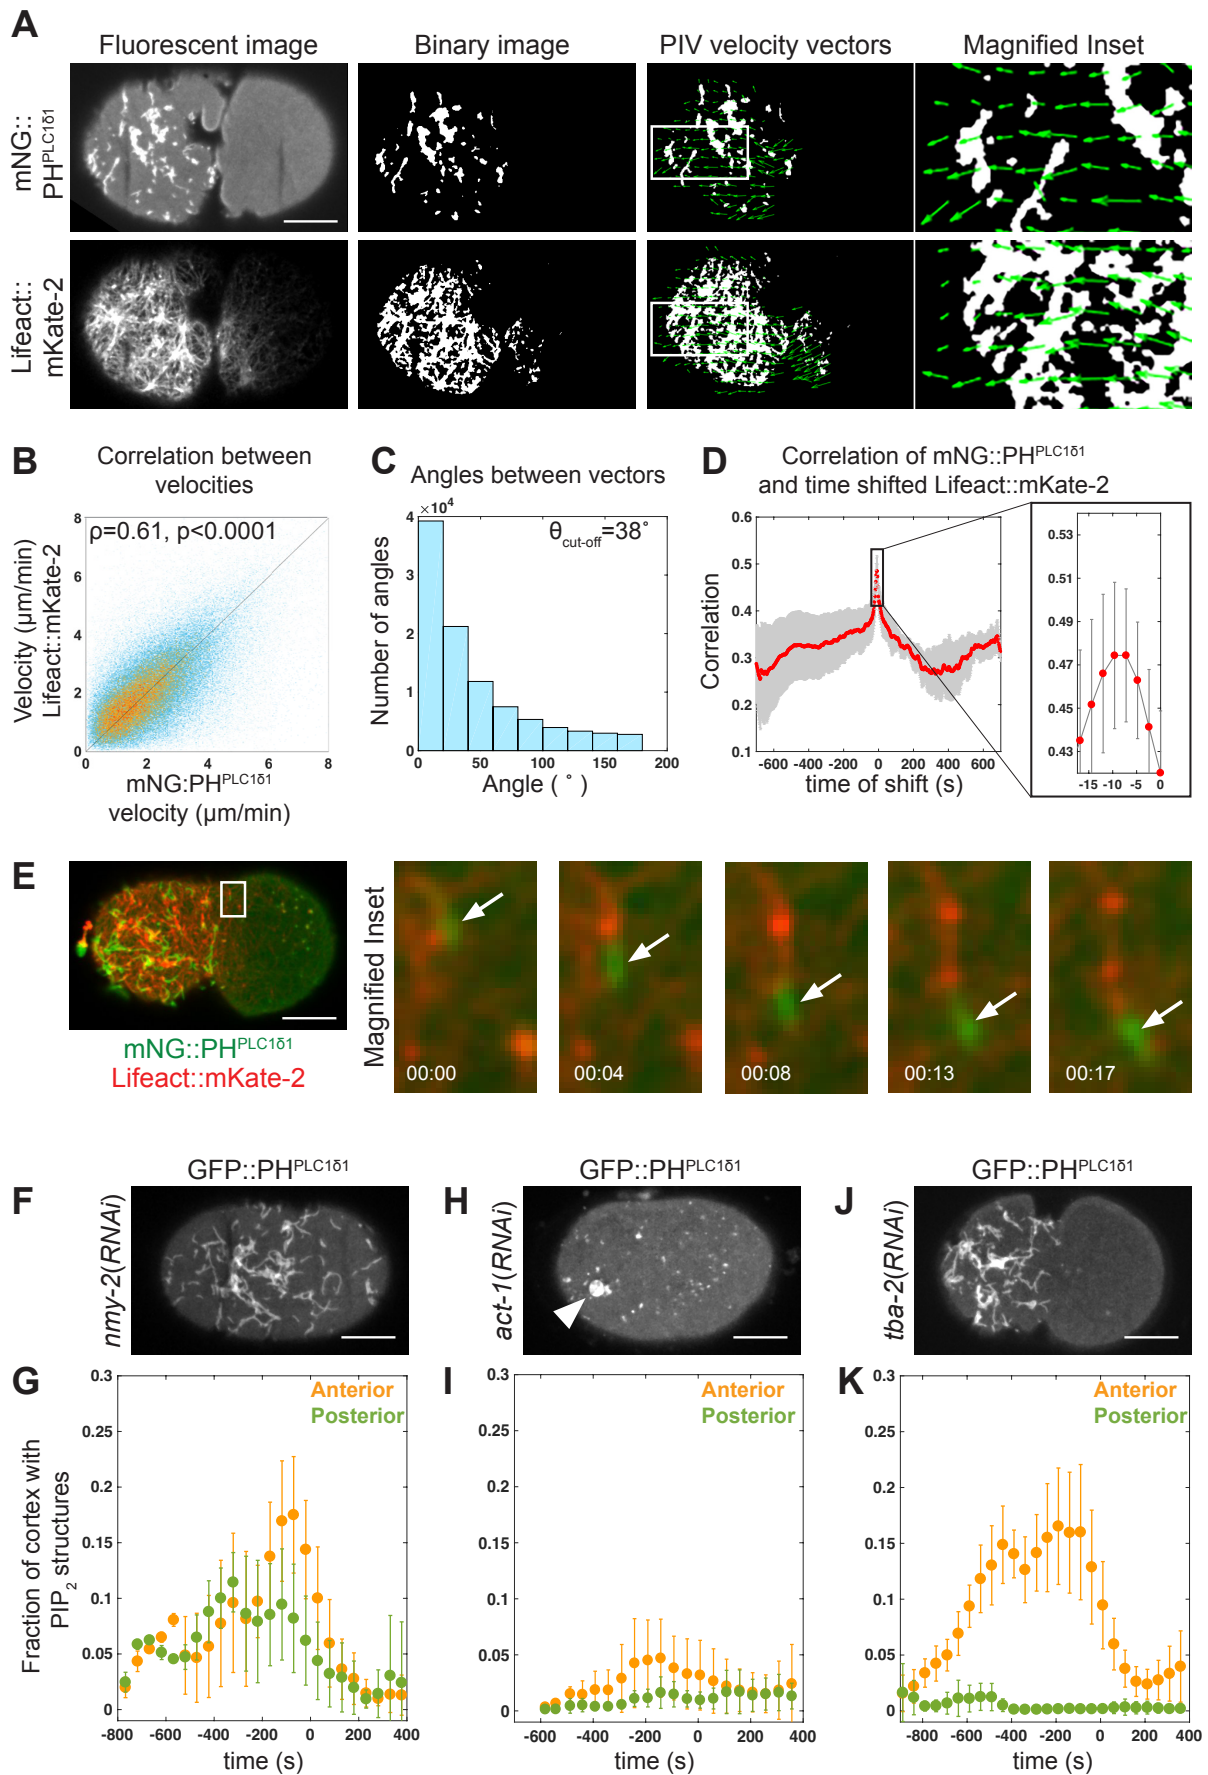

Figure 4



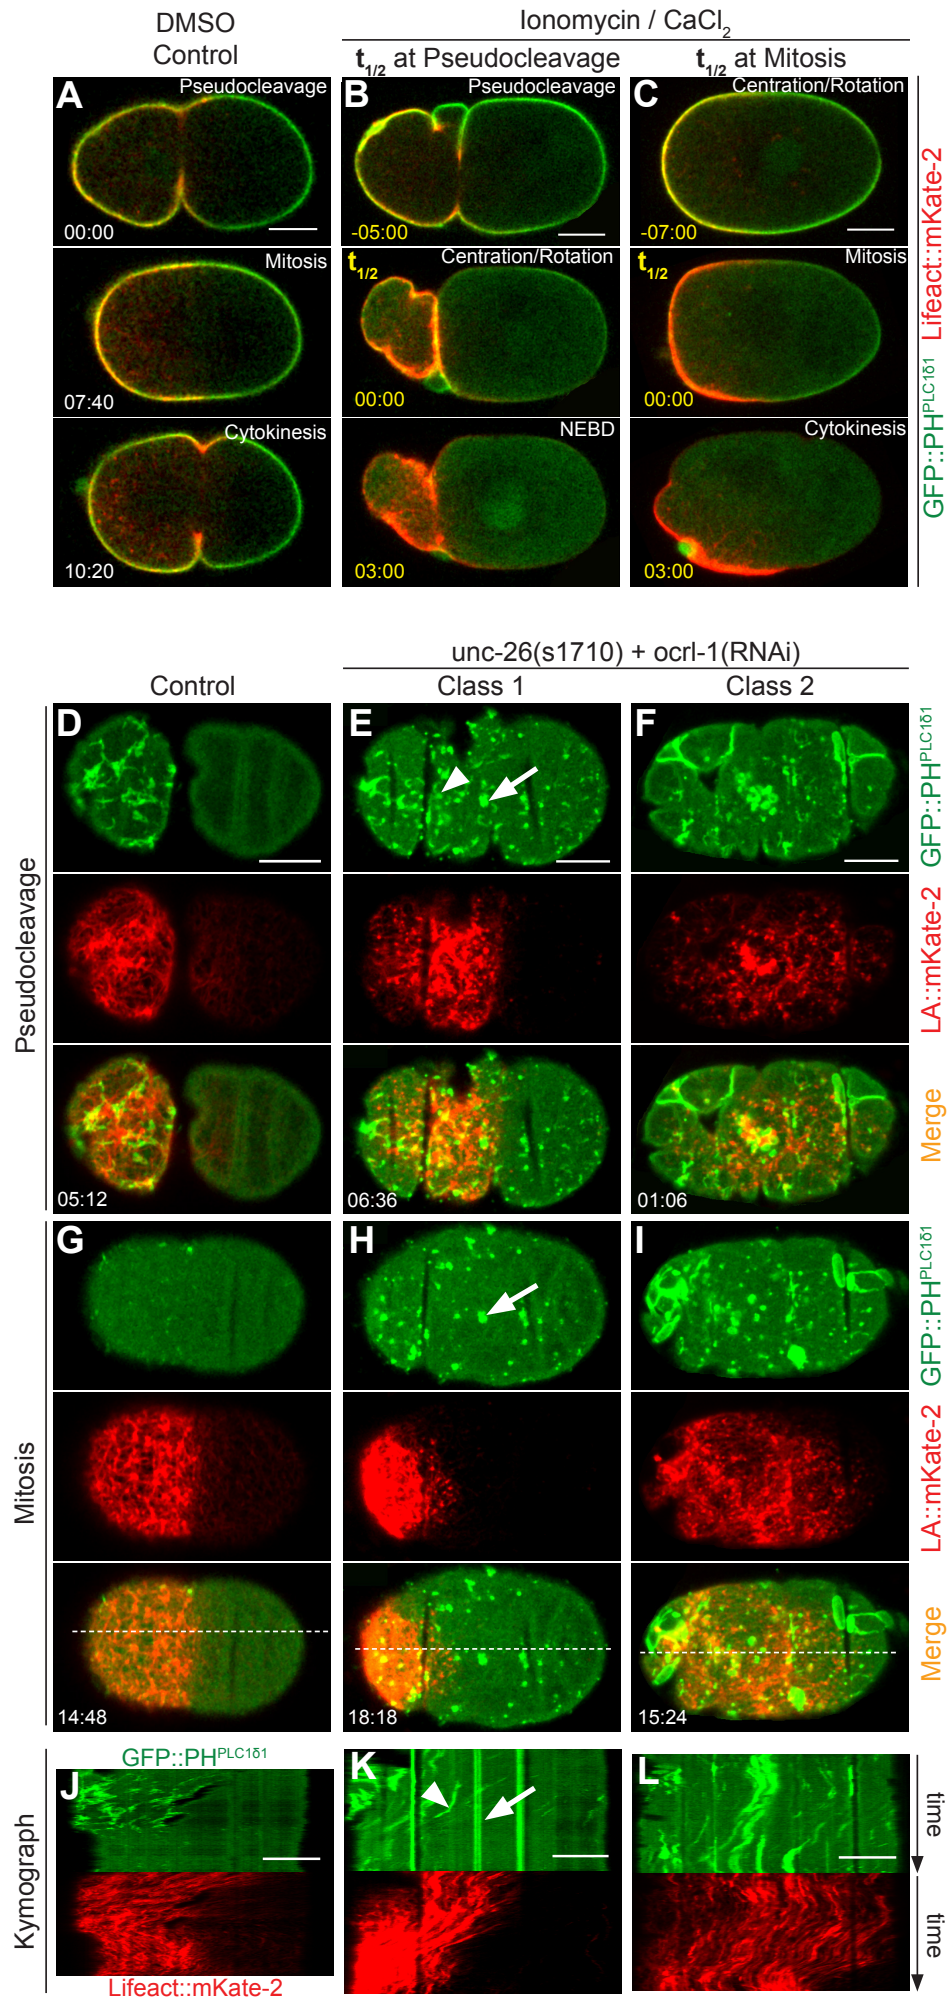

**Figure 5**

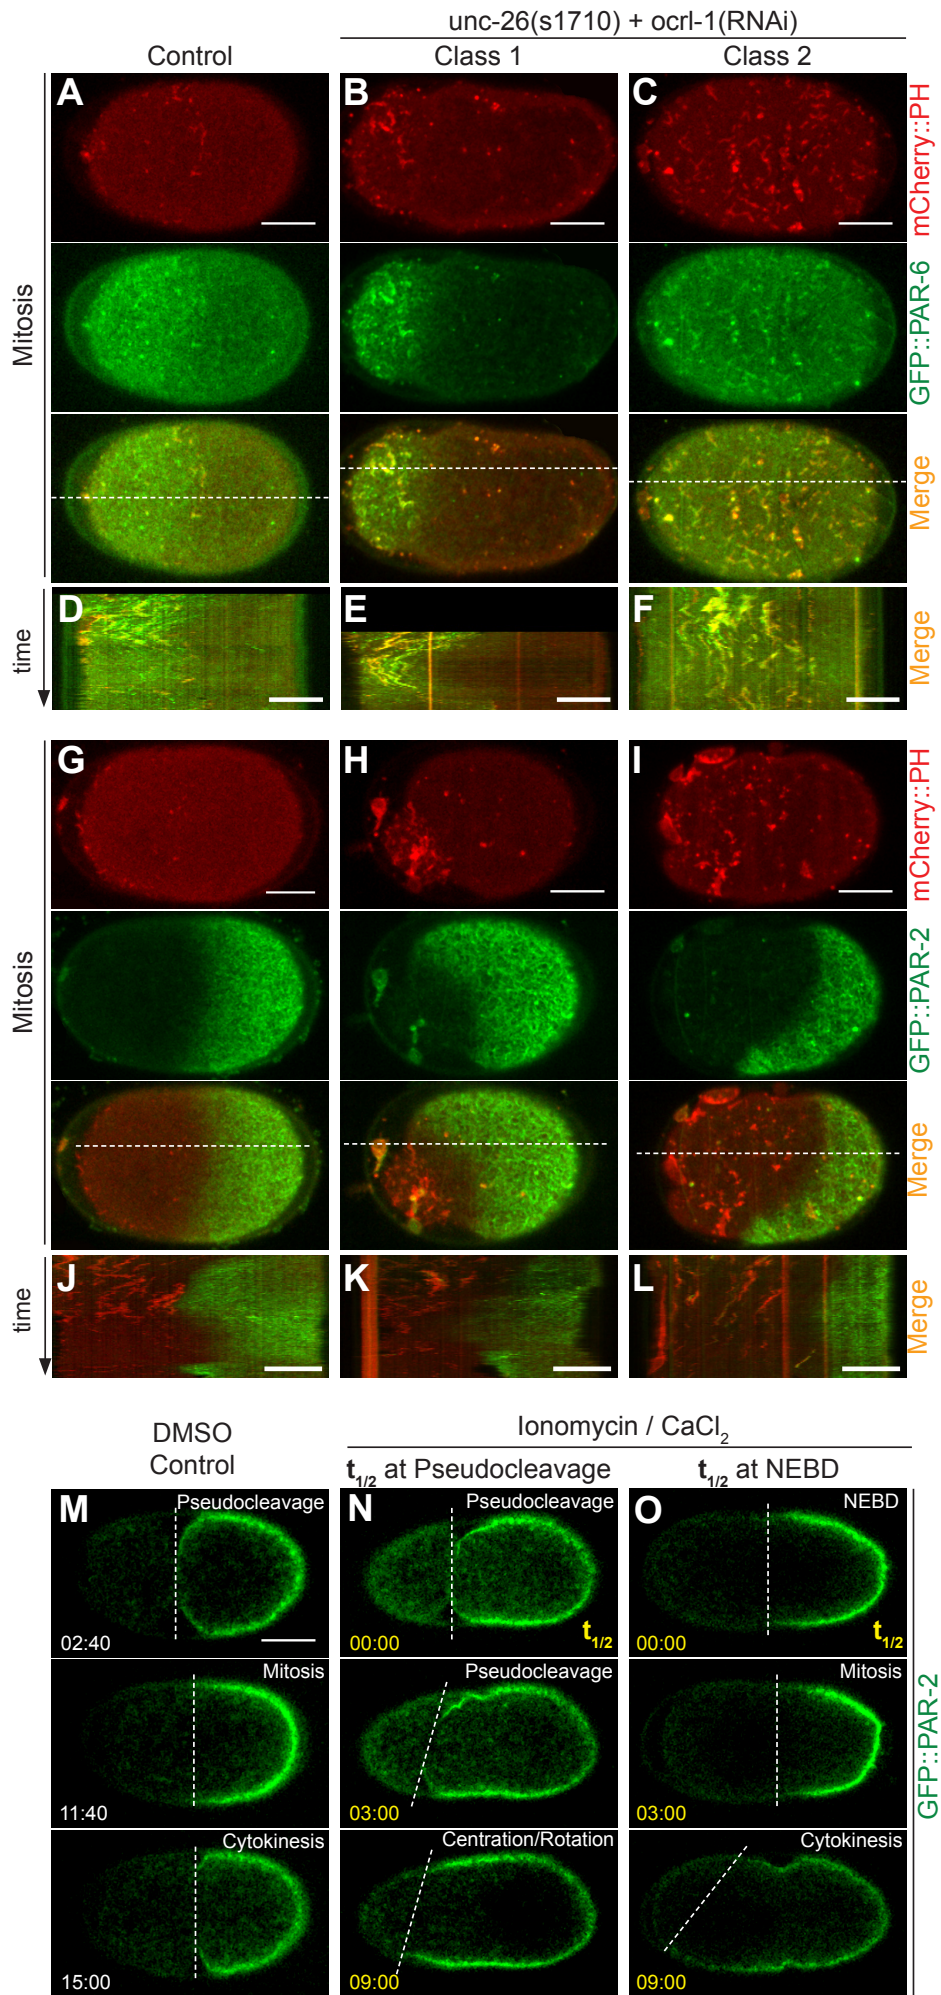

**Figure 6**



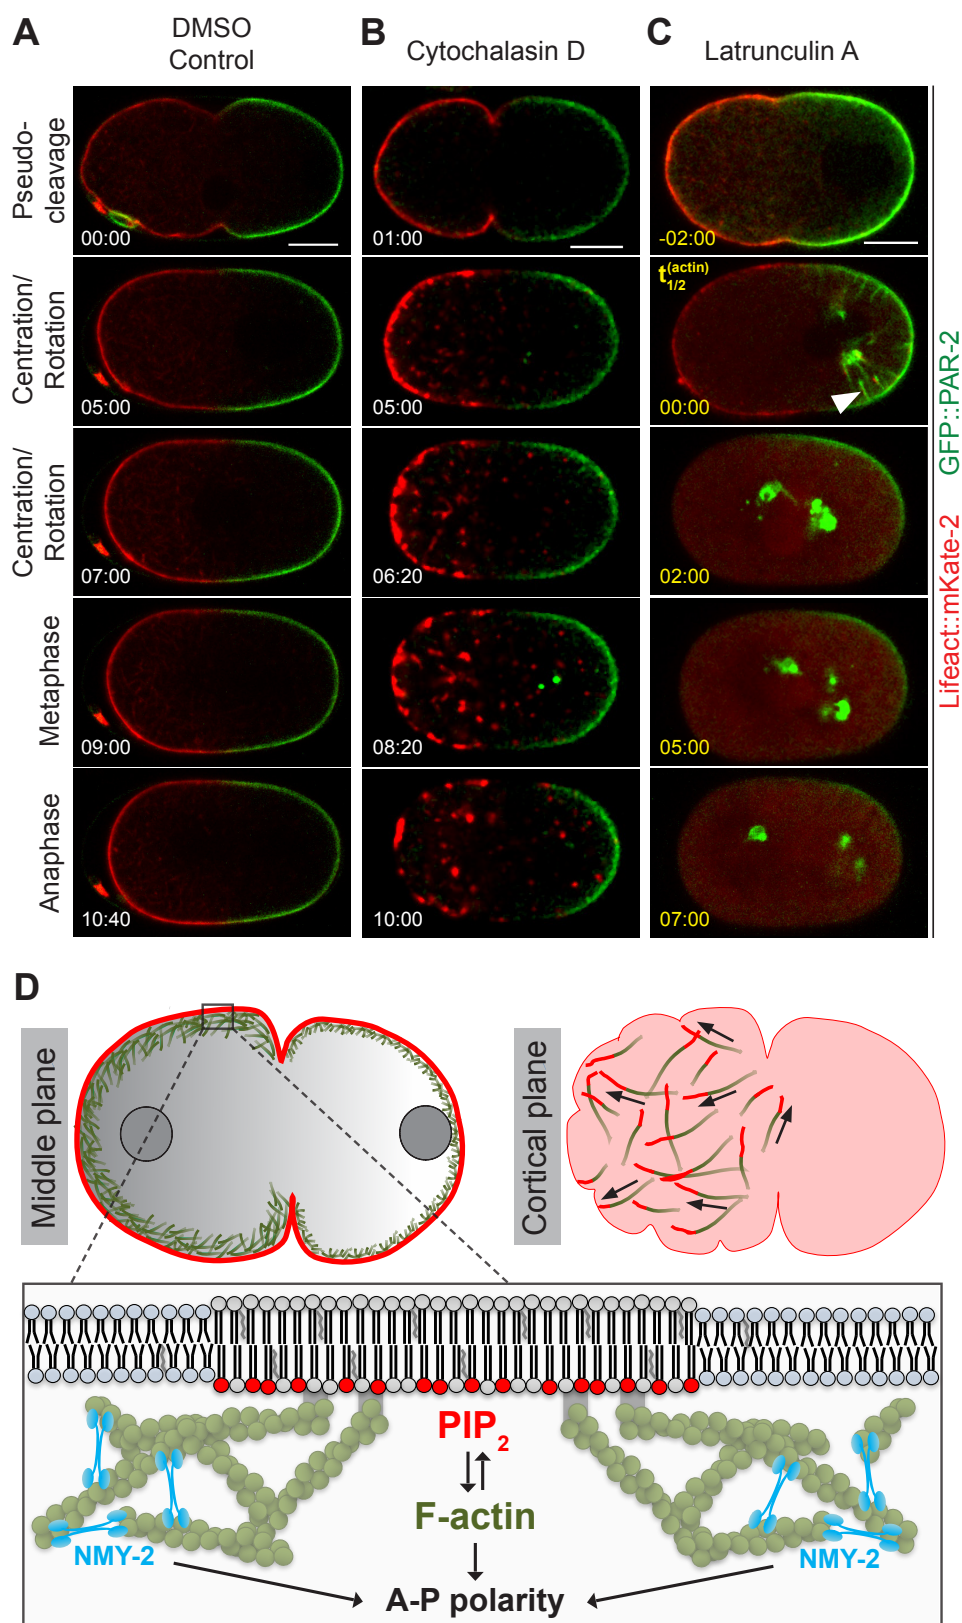

Figure 7
